# Supplementary material for: Pain and pressure pain thresholds in adolescents with chronic fatigue syndrome and healthy controls: a cross-sectional study
Source: PubMed Central journal article supplement — BMJ Open. 2014 Oct 6;4(10):e005920. doi: 10.1136/bmjopen-2014-005920 (PMC4187660; doi:10.1136/bmjopen-2014-005920), 2014-10-06
Supplement: bmjopen-2014-005920.draft_revisions.pdf [file bmjopen-2014-005920.draft_revisions.pdf]

# BMJ Open

## Pain and Pain Thresholds in Adolescents with Chronic Fatigue Syndrome

|                                 |                                                                                                                                                                                                                                                                                                                                                                                                                                                                                                                                                               |
|---------------------------------|---------------------------------------------------------------------------------------------------------------------------------------------------------------------------------------------------------------------------------------------------------------------------------------------------------------------------------------------------------------------------------------------------------------------------------------------------------------------------------------------------------------------------------------------------------------|
| Journal:                        | <i>BMJ Open</i>                                                                                                                                                                                                                                                                                                                                                                                                                                                                                                                                               |
| Manuscript ID:                  | bmjopen-2014-005920                                                                                                                                                                                                                                                                                                                                                                                                                                                                                                                                           |
| Article Type:                   | Research                                                                                                                                                                                                                                                                                                                                                                                                                                                                                                                                                      |
| Date Submitted by the Author:   | 17-Jun-2014                                                                                                                                                                                                                                                                                                                                                                                                                                                                                                                                                   |
| Complete List of Authors:       | Winger, Anette; Oslo and Akershus University College of Applied Sciences, Kvarstein, Gunnvald; University of Tromsø, the Article University of Norway, Department of Clinical Medicine<br>Wyller, Vegard; University of Oslo, Medical Faculty<br>Sulheim, Dag; Lillehammer County Hospital, Lillehammer, Department of Pediatrics, Norway<br>Fagermoen, Even; University of Oslo, Medical Faculty<br>Småstuen, Milada; Oslo and Akershus University College of Applied Sciences,<br>Helseth, Sølvi; Oslo and Akershus University College of Applied Sciences, |
| <b>Primary Subject Heading</b>: | Paediatrics                                                                                                                                                                                                                                                                                                                                                                                                                                                                                                                                                   |
| Secondary Subject Heading:      | Paediatrics                                                                                                                                                                                                                                                                                                                                                                                                                                                                                                                                                   |
| Keywords:                       | Pain management < ANAESTHETICS, PAIN MANAGEMENT, PUBLIC HEALTH                                                                                                                                                                                                                                                                                                                                                                                                                                                                                                |
|                                 |                                                                                                                                                                                                                                                                                                                                                                                                                                                                                                                                                               |

SCHOLARONE™  
Manuscripts

only

**Title Page****Pain and Pain Thresholds in Adolescents with Chronic Fatigue Syndrome**

Anette Winger<sup>1</sup>; RN, MA; Gunnvald Kvarstein<sup>2</sup>; MD, PhD, Professor; Vegard Bruun Wyller; MD, PhD, Professor<sup>3,4,5</sup>; Dag Sulheim; MD<sup>4,6</sup>; Even Fagermoen<sup>3</sup>; MD; Milada Cvancarova Småstuen<sup>1</sup>; MSc, PhD; Sølvi Helseth<sup>1</sup>; RN, PhD, Professor

<sup>1</sup>Institute of Nursing, Faculty of Health Sciences, Oslo and Akershus University College of Applied Sciences, Norway; <sup>2</sup>Department of Clinical Medicine, University of Tromsø, The Arctic University of Norway; <sup>3</sup>Institute of Clinical Medicine, Medical Faculty, University of Oslo, Norway; <sup>4</sup>Department of Pediatrics, Oslo University Hospital, Norway; <sup>5</sup>Department of Pediatrics, Akershus University Hospital, Norway; <sup>6</sup>Department of Pediatrics, Lillehammer County Hospital, Lillehammer, Norway.

**Corresponding author:** Anette Winger, Oslo and Akershus University of Applied Sciences, Postboks 4 St. Olavs plass, NO-0130 Oslo, Norway; telephone: 47 67 23 50 00/47 67 23 62 12; e-mail, [anette.winger@hioa.no](mailto:anette.winger@hioa.no)

Abbreviations: BPI- Brief Pain Inventory; CFS-Chronic fatigue syndrome; HC- Healthy Controls; NRS-Numeric Rating Scale; PPT-Pressure Pain Threshold; QoL- Quality of Life

Key Words: adolescents, pain threshold, Chronic fatigue syndrome, public health nurse, and pediatrician

Clinical Trials, NCT01040429; The Norwegian Study of Chronic Fatigue Syndrome in Adolescents: Pathophysiology and Intervention Trial (Nor CAPITAL) [www.clinicaltrials.gov](http://www.clinicaltrials.gov).

Length of article: 3251 words

What's known on this subject: Pain is an important symptom in chronic fatigue syndrome (CFS). However, this pain is poorly understood and little explored in adolescents with CFS.

What does this study add: The study describes the pain prevalence and severity in adolescents with CFS and demonstrates that they are significantly more interfered by pain compared to healthy adolescents in terms of pain frequency, pain severity, functional interference and pressure pain threshold (PPT).

## Pain and Pain Thresholds in Adolescents with Chronic Fatigue Syndrome

### ABSTRACT

**Background and objectives:** Although pain is a significant symptom in Chronic Fatigue Syndrome (CFS), pain is poorly understood in adolescents with CFS. The aim of this study was to explore the pain distribution and prevalence, pain intensity and its functional interference in everyday life, as well as pressure pain thresholds (PPT) in adolescents with CFS, and compare this with a control group of healthy adolescents (HC).

**Methods:** This is a case control, cross-sectional study on pain including 120 adolescents with CFS and 39 healthy controls, aged 12 to 18 years. We measured pain frequency, pain severity and pain interference using self-reporting questionnaires. PPT was measured using pressure algometry. Data were collected from March 2010 until October 2012 as part of The Norwegian Study of Chronic Fatigue Syndrome in Adolescents: Pathophysiology and Intervention Trial.

**Results:** Adolescents with CFS had significantly lower PPTs compared to HC ( $p<0.001$ ). The Pain Severity Score and Pain Interference Score were significantly higher in adolescents with CFS compared to HCs ( $p<0.001$ ). Almost all adolescents with CFS experienced headache, abdominal pain, and/or pain in muscles and joints. Moreover, in all sites the pain intensity levels were significantly higher than in HC ( $p<0.001$ ).

**Conclusions:** We found a higher prevalence of severe pain among adolescents with CFS and lowered pain thresholds compared to HC. The mechanisms, however, are still obscure. Large longitudinal population surveys are warranted measuring pain thresholds prior to the onset of CFS.

### Strengths and limitations

- This is the first study to test pressure-provoked pain in both adolescents with CFS and in healthy adolescents
- The relatively large sample of patients, together with few missing data strengthens the study
- The study only included patients who were able to attend our research clinic; and the results cannot be extrapolated to the most seriously affected CFS adolescents
- The study could have benefitted from a larger sample of healthy controls

## INTRODUCTION

Chronic fatigue syndrome (CFS) is a well-known condition among adolescents, with an estimated prevalence from 0.1% to 1.0%,[1, 2]. However, despite growing research, it is still a poorly understood disorder. According to US Centers for Disease Control (1994), a CFS diagnosis requires three criteria: 1) severe chronic fatigue for six or more consecutive months, 2) fatigue that significantly interferes with daily activities and 3) at least four out of eight other symptoms: post-exertional malaise lasting more than 24 hours, unrefreshing sleep, significant impairment of short-term memory or concentration, muscle pain, pain in the joints without swelling or redness, headaches of a new type, pattern, or severity, tender lymph nodes in the neck or armpit, and a sore throat that is frequent or recurring. Five out of these eight symptoms, are about pain,[3]. For some patients the ongoing pain is even more disabling than fatigue,[4] and is associated with poor physical function,[5]. Although some definitions emphasize pain as an important component,[3, 6], it is often ignored by clinicians and researchers,[7], and little progress has been made in understanding the pain component in patient with CFS,[8]. Patients with CFS report increased sensitivity to stimuli like light and sound,[9], and some researchers have hypothesized that the pain is caused by increased sensitivity of the nervous system,[10-12], defined as an “increased responsiveness to normal or sub-threshold input”,[13]. Based upon the theory of the Cognitive activation theory of stress (CATS) the sustained arousal theory was suggested as a mechanism for the development of CFS, resulting in several bodily symptoms, including pain,[14]. Hypersensitivity, measured by means of pressure is investigated in the adult CFS population, but only with a small number of patients,[12]; however, to our knowledge, this has not been studied in adolescents. So far, the pain research on adolescents with CFS has focused on the cluster of symptoms characterizing CFS,[1, 15-17]. One way to detect if there is an increased sensitivity is to compare pressure pain thresholds (PPT) in symptomatic and asymptomatic

1  
2  
3 areas in CFS patients to HCs,[7]. The International Association for the Study of Pain's (IASP)  
4  
5 definition of pain emphasizes that pain is a complex concept,[18]. Thus, there is a need for a  
6  
7 broad approach to understanding pain in patients with CFS.  
8  
9

10 The aim of this study was to evaluate pain in adolescents with CFS compared to  
11  
12 healthy adolescents, and more specifically explore: 1) the prevalence and location of pain  
13  
14 symptoms, 2) pain severity and its functional interference on everyday life and 3) baseline  
15  
16 pressure pain thresholds (PPTs).  
17  
18

## 19 20 **MATERIAL AND METHODS**

### 21 22 **Design**

23  
24 This is a case control, cross-sectional study, which compares pain (frequency, severity and  
25  
26 interference) and PPTs in adolescents with CFS to a comparable group of healthy adolescents.  
27  
28 The study is part of the NorCAPITAL-project (The Norwegian Study of Chronic Fatigue  
29  
30 Syndrome in Adolescents: Pathophysiology and Intervention Trial; Clinical Trials ID:  
31  
32 NCT01040429), which explores possible mechanisms of CFS, the effect of low-dose  
33  
34 clonidine treatment, and patients' experiences in adolescents with CFS,[9].  
35  
36  
37  
38  
39

### 40 41 **Participants**

#### 42 43 *CFS patients*

44  
45 One hundred and twenty adolescents with CFS and 39 adolescents, without any known health  
46  
47 problems, were recruited between March 2010 and March 2012. All pediatric departments in  
48  
49 Norwegian hospitals (n=20), as well as primary care pediatricians and general practitioners,  
50  
51 were invited to refer adolescents with CFS, aged 12 to 18, years to a central Norwegian  
52  
53 department of pediatrics. The referring units were required to confirm that the patients did not  
54  
55 have any medical or psychiatric disorder that might explain the fatigue. In agreement with  
56  
57  
58  
59  
60

clinical guidelines,[19, 20] a “broad” case definition with three months of unexplained, disabling fatigue of new onset was required. We did not require any other accompanying symptom criteria to be present. However, we required that the patient a) was unable to follow normal school routines due to fatigue; b) was not permanently bedridden; c) did not use pharmaceuticals (including hormone contraceptives) regularly. Those who fulfilled the pre-specified criteria for inclusion (Table 1) were included in the Nor CAPITAL study. Most participants, (75%), satisfied the Fukuda-criteria from the International Chronic Fatigue Syndrome Study Group,[3]. There are disagreements on the numbers of accompanying symptoms that has to be present for the diagnosis with CFS. At present, there is no evidence for an obvious cut-off for the number of symptoms,[19].

**Table 1.** Criteria for inclusion and exclusion

|                            | <b>CFS patients</b>                                                                                                                                                                                                                                                                                                                                                                                                                                                                                                                                                                  | <b>Healthy control subjects</b>                                                   |
|----------------------------|--------------------------------------------------------------------------------------------------------------------------------------------------------------------------------------------------------------------------------------------------------------------------------------------------------------------------------------------------------------------------------------------------------------------------------------------------------------------------------------------------------------------------------------------------------------------------------------|-----------------------------------------------------------------------------------|
| <b>Inclusion criteria:</b> | <p>Persisting or constantly relapsing fatigue lasting 3 months or more.</p> <p>Functional disability resulting from fatigue to a degree that prevent normal school attendance</p> <p>Age <math>\geq</math> 12 and &lt; 18 years</p>                                                                                                                                                                                                                                                                                                                                                  | <p>Age <math>\geq</math> 12 years and &lt; 18 years</p>                           |
| <b>Exclusion criteria:</b> | <p>Another current process or chronic disease or demanding life event that might explain the fatigue</p> <p>Permanent use of drugs (including hormones) possibly interfering with measurements</p> <p>Permanently bed-ridden</p> <p>Positive pregnancy test</p> <p>Pheochromocytoma</p> <p>Evidence of reduced cerebral and/or peripheral circulation due to vessel disease</p> <p>Polyneuropathy</p> <p>Renal insufficiency</p> <p>Known hypersensitivity towards clonidine or inert substances (lactose, saccharose) in capsula</p> <p>Abnormal ECG (apart from ectopic beats)</p> | <p>Another chronic disease</p> <p>Permanent use of drugs (including hormones)</p> |

Supine heart rate < 50 beats/min  
 Supine systolic blood pressure < 85 mmHg  
 Upright systolic blood pressure fall > 30 mmHg

The criteria are designed for the randomized control trial in the NorCAPITAL-project (The Norwegian Study of Chronic Fatigue Syndrome in Adolescents: Pathophysiology and Intervention Trial; Clinical Trials ID: NCT01040429), which explores possible mechanisms of CFS, the effect of low-dose clonidine treatment, and patients' experiences in adolescents with CFS (9).

In our study, there was no difference between patients and controls regarding socioeconomic status (Table 2). It is important to bear in mind that the economical differences between social classes are not as pronounced in the Norwegian society as in other Western societies, and all individuals in Norway have equal access to medical care. However, using level of education as a surrogate for social class, we still found no difference between the two groups.

**Table 2.** Demographic data and adherence to specific CFS criteria (Fukuda, 1994).

|                                  |              | CFS patients | controls   |
|----------------------------------|--------------|--------------|------------|
| <b>Male-</b>                     | no (%)       | 34 (28)      | 11 (28.2)  |
| <b>Female-</b>                   | no (%)       | 86 (72)      | 28 (71.8)  |
| <b>Age (years)</b>               | mean (SD)    | 15.4 (1.6)   | 15.2 (1.6) |
| <b>Disease duration (months)</b> | mean (range) | 21.4 (4-104) | n.a.       |
| <b>Fukuda-criteria</b>           | no (%)       | 88 (75)      | n.a.       |
| <b>Lives with both parents</b>   | no (%)       | 85 (73)      | 26 (70)    |
| <b>Parents highest education</b> |              |              |            |
| <b>Primary school</b>            | no (%)       | 5 (4.3)      | 0 (0)      |
| <b>Secondary school</b>          | no (%)       | 30 (26)      | 8 (23)     |
| <b>Lower University</b>          | no (%)       | 34 (29)      | 9 (23)     |
| <b>Higher University</b>         | no (%)       | 48 (41)      | 19 (54)    |

#### *A control group of healthy adolescents*

To recruit a control group of healthy adolescents, information of the study was sent to the local schools. Those who replied were given extended information. No regular use of pharmaceuticals was allowed. A group of 39 adolescents, reporting themselves as healthy and normally active and matched on gender and age, was enrolled,[9].

## Measures

### *Brief Pain Inventory (BPI):*

To assess pain, the Brief Pain Inventory (BPI) was used,[21]. BPI assesses the intensities of pain and to what extent pain interferes with different aspects of life,[22]. The Norwegian version of BPI has been validated in cancer pain patients,[23], several chronic non- malign and musculoskeletal disorders,[24, 25], and in youths with neuromuscular diseases,[26].

In order to reduce the total burden of questions, we removed the question about pain interference with sleep. To make it more age-relevant, we asked how pain affected school and homework instead of asking how pain affected work. “Total Pain Severity Score” was expressed as the mean of the four pain intensity items while “Total Pain Interference Score” was obtained by calculating the mean of the seven interference items,[24]. By removing the question about sleep we ended up with six interference scores that were averaged. Internal consistency of the modified questionnaire was assessed with Cronbach’s alpha computed separately for cases and controls. The values were 0.89 and 0.87 for cases and controls, respectively.

Each item from BPI was read aloud by one of the researchers and answered by the participant. In the body diagram of BPI patients were asked to indicate the location of their pain by shading the areas corresponding to painful areas of their own body.

### *CFS questionnaire*

A comprehensive CFS questionnaire was constructed and used in the Nor CAPITAL study,[9], and in the present study we focused on four questions from this inventory related to pain: headache, pain in muscles, pain in joint(s), and pain in the abdomen. Frequency of pain was measured on a five point Likert scale. Single item questions about pain has shown to be



1  
2  
3 reliable in measuring pain in children and adolescents,[27]. In contrast to the BPI, which was  
4  
5 filled in at the hospital, the CFS inventory was filled in by the participants at home and  
6  
7 returned in pre- stamped envelopes within a few weeks. All measures were done at baseline,  
8  
9 eight weeks after inclusion, and 30 weeks after inclusion. Only the baseline data are presented  
10  
11 here.

### 12 13 14 *Pressure pain threshold*

15  
16  
17 The pressure pain threshold (PPT) is a reliable variable to test for hyperalgesia in superficial  
18  
19 structures like skin, nails and underlying muscles,[28]. The pain threshold is defined by IASP  
20  
21 (1986) as “the minimum intensity of a stimulus that is perceived as painful.”,[13]. To  
22  
23 investigate if there are group differences in pressure-provoked pain, the pain thresholds were  
24  
25 mapped using a commercially available force transducer with a rubber tip of 0.5 cm<sup>2</sup>  
26  
27 (Algometer, JTECH, medical, Salt Lake City, USA). For pressure measurements, we selected  
28  
29 three pre-defined sites: 1) the fingernail of the third finger, 2) skin superficial to the trapezius  
30  
31 (ascending part) and 3) supraspinatus muscles bilaterally. We intended to measure PPTs both  
32  
33 at places where people commonly have pain (trapezius and supraspinatus), and places that  
34  
35 rarely hurt (fingernails). Reduced thresholds on both symptomatic and asymptomatic/remote  
36  
37 places may indicate a general sensitization,[12]. The pressure stimuli were applied twice to  
38  
39 each spot with increasing intensity until the pressure pain threshold was reached. For each  
40  
41 person we assessed all sites in the same order. The participants were instructed to indicate the  
42  
43 pain threshold by saying, “stop”. In between the two measurements, they filled in the BPI  
44  
45 assessment form, which took about ten minutes to fulfill.  
46  
47  
48  
49  
50

### 51 **Ethical considerations**

52  
53  
54  
55 The study was approved by Norwegian Social Science Data Service (NSD) and by the  
56  
57 Norwegian Regional Committee for Medical and Health Research Ethics (REK). Participation  
58  
59  
60

in the project required informed consent by the adolescent and by his or her parents/next-of-kin, after written and oral information about the study.

### Statistical analyses

Continuous variables are presented with medians and ranges while categorical variables are described as counts and percentages. Pain intensity and pain interference were measured on ordinal scales, and group differences were therefore analyzed by a non-parametric test (Mann Whitney Wilcoxon-test). For frequency differences between the groups, the Chi-square test was applied. An average of two pain pressure threshold measurements were calculated for three body parts on each body side. As the values were normally distributed in both groups, they were compared using two-independent samples *t*-test.

To assess internal consistency of the instruments, Cronbach's alpha was computed separately for cases and controls. Alpha >0.7 was considered acceptable,[29]. All tests were two-sided, and due to multiple testing, only *p*-values<0.01 were considered statistically significant. All analyses were performed using SPSS, version IBM Statistics 20.

## RESULTS

In the whole sample (including the CFS and the control group), about 25% were males and 75% females. The age ranged from 12 -18 years (Table 2). There were almost no missing data in any of the data sets (details are given in Tables 3 and 4). There were no statistically significant differences between cases and controls concerning possible confounders (age, BMI and gender distribution).

**Table 3.** Frequency of pain episodes in different locations among CFS patients and healthy controls

|           | CFS patients n= 120 (%) |         |         |         | Healthy controls n=39 (%) |         |         |         |
|-----------|-------------------------|---------|---------|---------|---------------------------|---------|---------|---------|
| Frequency | Head                    | Abdomen | Joints  | Muscles | Head                      | Abdomen | Joints  | Muscles |
| 0-1 t/mo  | 9 (8)                   | 30 (25) | 36 (30) | 21 (18) | 18 (46)                   | 20 (51) | 35 (90) | 26 (67) |

|                    |         |         |         |         |         |         |      |        |
|--------------------|---------|---------|---------|---------|---------|---------|------|--------|
| <b>2-3 t/mo</b>    | 28 (23) | 30 (25) | 19 (16) | 20 (17) | 14 (36) | 15 (39) | 2(5) | 7 (18) |
| <b>1-2 t/w</b>     | 28 (23) | 21 (18) | 24 (20) | 24 (20) | 4 (10)  | 1 (3)   | 0    | 2 (5)  |
| <b>3-5 t/w</b>     | 20 (17) | 21 (18) | 15 (13) | 17 (14) | 0       | 1 (3)   | 0    | 1 (3)  |
| <b>~ every day</b> | 32 (27) | 15 (13) | 23 (20) | 34 (28) | 1 (3)   | 0       | 0    | 1 (3)  |
| <b>Missing (%)</b> | 2.5     | 2.5     | 2.5     | 3.3     | 5.1     | 5.1     | 5.1  | 5.1    |

Group comparisons for different pain sites (head, abdomen, joints and muscles);  $p < 0.001$  for all four sites  
mo= month, w= week

**Table 4.** Pain Intensity, Severity and Interference scores among CFS patients and healthy controls

|                                      | CFS patients |                | Healthy controls |                | <i>p</i> -value* |
|--------------------------------------|--------------|----------------|------------------|----------------|------------------|
|                                      | N            | Median (Range) | n                | Median (Range) |                  |
| <b>Pain worst</b>                    | 117          | 6 (0-10)       | 39               | 3 (0-10)       |                  |
| <b>Pain least</b>                    | 118          | 1 (0-7)        | 39               | 0 (0-7)        |                  |
| <b>Pain average</b>                  | 118          | 5 (0-9)        | 39               | 3 (0-6)        |                  |
| <b>Pain now</b>                      | 118          | 2 (0-8)        | 39               | 0 (0-7)        |                  |
| <b>Total Pain Severity score</b>     | 117          | 14,5 (0-31)    | 39               | 6 (0-23)       | <0.001           |
| <b>Interference to:</b>              |              |                |                  |                |                  |
| <b>General activity</b>              | 118          | 4 (0-10)       | 39               | 1 (0-8)        |                  |
| <b>Mood</b>                          | 118          | 3 (0-9)        | 39               | 1 (0-8)        |                  |
| <b>Walking</b>                       | 118          | 2 (0-10)       | 39               | 0 (0-7)        |                  |
| <b>School</b>                        | 118          | 4 (0-10)       | 39               | 0 (0-8)        |                  |
| <b>Relation to others</b>            | 118          | 2 (0-9)        | 39               | 0 (0-8)        |                  |
| <b>Enjoy of life</b>                 | 118          | 2 (0-9)        | 39               | 0 (0-10)       |                  |
| <b>Total Pain Interference score</b> | 118          | 17 (0-49)      | 39               | 4 (0-36)       | <0.001           |

\*Statistical group comparisons; Mann-Whitney-Wilcoxon test

### Pain prevalence and distribution

The frequency data from the CFS Symptom Inventory showed that adolescents with CFS were weekly seriously influenced by pain (Table 3). Summing up the categories 3, 4 and 5 in Table 2, almost all adolescents with CFS vs. one third of the HC reported pain during the previous week, and the group difference was statistically highly significant. Headache was most common (67% reported weekly attacks), followed by muscle pain (62%), pain in joints (53%), and abdominal pain (49%). Headache was also the most reported pain in HC (13%), followed by pain in muscles (11%) and abdominal pain (6%). No HC reported pain in joints as a problem on a weekly basis. Studying the body map, almost 30% of the patients with CFS marked more than four sites as painful while none of the HCs did (Figure 1).

1  
2  
3 **Figure 1.** Number of body sites mapped as painful among CFS patients and healthy controls  
4  
5 (insert)  
6  
7

### 8 **Pain severity and functional interference**

9

10  
11 CFS patients demonstrated higher Pain Severity Scores ( $p < 0.001$ ) and Pain Interference  
12 scores ( $p < 0.001$ ) than HCs. Among the CFS patients, pain interfered most with attendance at  
13 school and general activity (Table 4). Ability to enjoy life, however, was one of the life  
14 domains that was least affected by pain, both among CFS patients and HCs, but it is important  
15 to notice that 8.4% of the adolescents with CFS scored above seven on this item. Three HCs  
16 scored high on pain severity while four on pain interference, reflecting the large variation in  
17 the normal population.  
18  
19  
20  
21  
22  
23  
24  
25

### 26 **Pressure pain thresholds**

27

28  
29  
30 At all measure points, PPT were statistically significantly lower (all  $p < 0.001$ ) among CFS  
31 patients than HCs. For trapezius muscle the mean values were 15.4, 95%CI [14.1- 16.8] and  
32 24.5, 95%CI [21.0- 28.0] for cases and controls, respectively. For fingernails 18.5, 95%CI  
33 [16.9- 20.0] for cases and 30.8, 95%CI [26.5- 35.4] for controls. Concerning supraspinatus  
34 muscle the mean values were 17.1 [15.6-18.6] and 27.7 [23.3- 31.6] for cases and controls  
35 respectively. The values show that PPT was as much as 50% lower both in areas that usually  
36 are painful (muscles) and areas that usually are not reported painful (finger nails). There were  
37 no missing data for HCs and for CFS patient's data was missing for one individual.  
38  
39  
40  
41  
42  
43  
44  
45  
46  
47  
48  
49  
50  
51  
52  
53  
54  
55  
56  
57  
58  
59  
60

## DISCUSSION

This study shows that adolescents with CFS have significantly lower pain thresholds than a control group of healthy adolescents. The study also demonstrates that adolescents with CFS are severely troubled by pain, and that pain has great functional consequences. A more unexpected finding is the lower pain interference on joy of life for the cases.

### **Hypersensitivity and frequency of pain**

We found significantly lower PPTs among adolescents with CFS compared with HCs at all three sites (trapezius and supraspinatus muscles and nails) and in both symptomatic and asymptomatic places. This finding could indicate a more general sensitization of the nervous system,[30]. General hypersensitivity has been suggested as a reason for pain among CFS patients, as it has for chronic widespread pain,[10] and fibromyalgia,[31]. Our own research group found significantly higher sensitivity scores among adolescents with CFS and hypothesizes that the hypersensitivity could be an effect of sustained arousal,[9]. Other researchers have highlighted altered pain inhibition as a potential factor in patients with generalized pain,[32]. Patients with CFS have also reported being more sensitive to other sensory stimulations like light and sound,[9, 33]. Thus, it might be the case that adolescents with CFS are more sensitive to all types of sensory stimuli. On the other hand, it should be borne in mind that lowered PPT only reflects increased sensitivity to mechanical stimuli, and do not predict the response to, for instance, thermal stimuli.

Researchers have suggested that CFS patients are genetically more prone to develop the disease,[14], and epidemiological studies have demonstrated a genetic predisposition to chronic pain,[34]. The factors and processes for pain among CFS patients remain unclear, but in other populations, pain beliefs, feelings, understanding of pain and psychosocial factors have been found to influence the perception of pain,[35]. In patient with fibromyalgia Turk et

1  
2  
3 al. (2003) showed that fear of movement maintains the pain experience and increases the  
4 disability,[35]. There is no obvious reason to believe that this is not the case for adolescents  
5 with CFS. A multidimensional perspective of CFS is in line with the sustained arousal theory,  
6 acknowledging the impact of cognitive processes on physiological responses and thereby  
7 opposing a fundamental dichotomy between bodily and mental processes,[14]. A  
8 multidimensional perspective and a bio-psychosocial approach for this group of patients are in  
9 line with other studies,[36, 37]. More knowledge about pain and the relation to increased  
10 sensitivity before and throughout the process of the illness might provide a better  
11 understanding of CFS. As far as we know, there is no published study focusing on this aspect.  
12  
13  
14  
15  
16  
17  
18  
19  
20  
21  
22  
23

24 As the present study shows, almost all adolescents with CFS suffered from weekly  
25 pain, and pain on a daily basis was a problem for a large proportion of the patients. The CFS  
26 patients reported significantly more pain compared with the HC, but interestingly, they  
27 reported pain in the same places as the HCs did, although the pain frequency was higher. In  
28 both groups, headache was the most common pain followed by abdominal pain. Of the CFS  
29 patients, 67% experienced weekly headache and of these 27% had headache every day. For  
30 the HCs, these numbers were respectively 13% and 3%. Pain is indeed a common problem  
31 among teenagers in general,[38-41]; in a large Norwegian health survey 10% of healthy  
32 adolescents reported pain on a daily basis, and 19% were troubled by musculoskeletal or  
33 abdominal pain,[40]. In our study 49% reported abdominal pain every week. Such a high  
34 proportion of recurrent abdominal pain (49%) has also been reported in a study on CFS  
35 adolescents from the UK,[42]. The same authors have in a previous study demonstrated same  
36 somatic symptoms among HCs and adolescents with CFS, although with a lower degree of  
37 severity,[43]; headache and sore muscles were among the top ten bodily complaints. The  
38 largest group difference in the present study was joint pain. Of the HCs, only 10% reported  
39 pain more frequently than once a month, vs. 70% of the adolescents with CFS.  
40  
41  
42  
43  
44  
45  
46  
47  
48  
49  
50  
51  
52  
53  
54  
55  
56  
57  
58  
59  
60

### **Pain severity and interference in daily life**

From healthy controls we know that physical activity has an important pain protective effect,[40], and Crawley and Stern (2009) have shown that impaired physical function is associated with higher levels of fatigue, pain and low mood,[5]. Complicating this, pain thresholds in patients with CFS have been found to decrease after physical exercises,[44], and patients may easily develop a fear of movement behavior. This illustrates how several contributing factors may influence the pain condition.

Although average Pain Severity Scores were relatively moderate in the CFS group (table 4), health care providers should bear in mind that the total sum of pain and fatigue over time might represent a heavy burden with serious long term consequences,[37]. In larger studies on children and adolescents with long-lasting pain, pain has been associated with substantial reductions in health- related quality of life (QoL),[38, 45, 46]. In our study, the pain influenced school attendance, general activity and mood. Particularly interference on school attendance has been shown to strongly affect the quality of life in adolescents with CFS,[43, 47]. Some of our patients felt it was difficult to assess the interference of pain, and to separate what was caused by fatigue and what was caused by pain, and the second part of BPI (mapping the interference of pain) has for that reason been criticized,[23]. Although the participants were told to concentrate on pain and not the fatigue, we realize that fatigue may still a confounding factor and daily life was most likely to be affected by both.

### **Strengths and limitations**

This is the first study to include a broader focus on pain in adolescents with CFS, and to test pressure-provoked pain in both adolescents with CFS and in healthy adolescents. The relatively large sample of patients together with few missing data strengthen the study. The wide inclusion criteria suggest generalizability to the population of adolescents with CFS

1  
2  
3 referred to pediatric care. Only two patients reported a short disease duration between three  
4  
5 and six month,[9], and the results should be generalizable to populations with a more chronic  
6  
7 CFS condition (more than six months). The Nor CAPITAL study did have one clear selection  
8  
9 bias, as the study only included patients who were able to attend our research clinic; and the  
10  
11 results cannot be extrapolated to the most seriously affected CFS adolescents. One question  
12  
13 from the original BPI questionnaire was removed and this might have affected the  
14  
15 psychometric property, hence we performed a factor analysis on BPI interference scores  
16  
17 showing a strong internal consistency for both cases and controls. The control group of  
18  
19 adolescents is smaller than the CFS group, and the study could have benefited from a larger  
20  
21 sample of controls, even if a power calculation based upon previous studies,[36] give reasons  
22  
23 to assume that the samples would be sufficient to discover significantly and clinically  
24  
25 interesting group differences,[9].  
26  
27  
28  
29

## 30 31 **CONCLUSION**

32  
33 We found a higher prevalence of severe pain among adolescents with CFS and lowered pain  
34  
35 thresholds compared to healthy controls. Pain has great functional consequences and the total  
36  
37 sum of bodily symptoms is a heavy burden.  
38  
39

## 40 41 **Acknowledgments**

42  
43 Kari Gjersum, Berit Widerøe Njølstad, Adelheid Holm, Marianne Svendsen, Anne Marie  
44  
45 Halstensen, Kristin Villa, Esther Gangsø, Hamsana Chandrakumar, Anna Marie Thorendal  
46  
47 Ryenbakken all participants and their parents/next-of-kin.  
48

49  
50 The information reported in this manuscript has not been presented in any other journal.

51  
52 The authors have no financial relationship nor any other conflict of interest to disclose.  
53  
54  
55  
56  
57  
58  
59  
60



## Contributors' Statements Page

The following persons are qualified for authorship:

Even Fagermoen: MD Fagermoen conceptualized and designed the study, acquired data and critically revised the manuscript for important intellectual content and approved the final manuscript as submitted

Sølvi Helseth: Professor Helseth conceptualized and designed the study, analyzed and interpreted data, drafted the manuscript, critically revised the manuscript for important intellectual content, obtained funding and approved the final manuscript as submitted

Gunnvald Kvarstein: Professor Kvarstein conceptualized and designed the study, analyzed and interpreted data, drafted the manuscript, critically revised the manuscript for important intellectual content and approved the final manuscript as submitted

Milada Cvancarova Småstuen: Dr. Småstuen analyzed and interpreted data, carried out the statistical analyzes, critically revised the manuscript for important intellectual content and approved the final manuscript as submitted

Dag Sulheim: MD Sulheim conceptualized and designed the study, acquired data and critically revised the manuscript for important intellectual content and approved the final manuscript as submitted

Anette Winger: PhD-student Winger conceptualized and designed the study, acquired data, analyzed and interpreted data, drafted the manuscript and critically revised the manuscript for important intellectual content, carried out the statistical analyzes, obtained funding and approved the final manuscript as submitted.

Vegard Bruun Wyller: Professor Wyller conceptualized and designed the study, critically revised the manuscript for important intellectual content, obtained funding and approved the final manuscript as submitted

Acknowledgments:

Kari Gjersum provided secretarial assistance, Berit Widerøe Njølstad, MA; Adelheid Holm, RN; Marianne Svendsen, BSc; Anne Marie Halstensen, RN; Kristin Villa, RN; Esther Gangsø, BSc; Hamsana Chandrakumar, BSc and Anna Marie Thorendal Ryebakken provided practical assistance.

Competing interests: To the author's knowledge, no conflict of interest, financial or other, exists.

Funding/Support: As part of the Nor CAPITAL-project this study was funded by Health South-East Hospital Trust, the University of Oslo, Oslo and Akesrhus University College of Applied Sciences, the Norwegian Competence Network of Pediatric Pharmacotherapy, Simon Fougner Hartman's Family Foundation, and Eckbo's Family Foundation funded this study.

Role of the Sponsor: The sponsors had no role in the design and conduct of the study; collection, management, analysis, or interpretation of the data; preparation, review, or approval of the manuscript; and decision to submit the manuscript for publication.

No additional data available.

## References

1. Nijhof SL, Maijer K, Bleijenberg G, et al. Adolescent chronic fatigue syndrome: prevalence, incidence, and morbidity. *Pediatrics* 2011;127(5):e1169-75.
2. Crawley EM, Emond AM, Sterne JA. Unidentified Chronic Fatigue Syndrome/myalgic encephalomyelitis (CFS/ME) is a major cause of school absence: surveillance outcomes from school-based clinics. *BMJ open* 2011;1(2):e000252.
3. Fukuda K, Straus SE, Hickie I, et al. The Chronic Fatigue Syndrome: A Comprehensive Approach to Its Definition and Study. *Annals of Internal Medicine* 1994;121(12):953.
4. Knoop H, Stulemeijer M, Prins JB, et al. Is cognitive behaviour therapy for chronic fatigue syndrome also effective for pain symptoms? *Behaviour Research And Therapy* 2007;45(9):2034-43.
5. Crawley E, Sterne JA. Association between school absence and physical function in paediatric chronic fatigue syndrome/myalgic encephalopathy. *Archives of Disease in Childhood* 2009;94(10):752-56.
6. Carruthers BM, van de Sande MI, De Meirleir KL, et al. Myalgic encephalomyelitis: International Consensus Criteria. *J Intern Med* 2011;270(4):327-38.
7. Nijs J, Crombez G, Meeus M, et al. Pain in patients with chronic fatigue syndrome: time for specific pain treatment? *Pain physician* 2012;15(5):E677-86.
8. Meeus M, Nijs J, Meirleir KD. Chronic musculoskeletal pain in patients with the chronic fatigue syndrome: a systematic review. *European Journal Of Pain (London, England)* 2007;11(4):377-86.
9. Sulheim D, Fagermoen E, Winger A, et al. Disease Mechanisms and Clonidine Treatment in Adolescent Chronic Fatigue Syndrome: A Combined Cross-sectional and Randomized Clinical Trial. *JAMA pediatrics* 2014.
10. Meeus M, Nijs J. Central sensitization: a biopsychosocial explanation for chronic widespread pain in patients with fibromyalgia and chronic fatigue syndrome. *Clinical Rheumatology* 2007;26(4):465-73.
11. Meeus M, Roussel NA, Truijen S, et al. Reduced pressure pain thresholds in response to exercise in chronic fatigue syndrome but not in chronic low back pain: an experimental study. *Journal of rehabilitation medicine : official journal of the UEMS European Board of Physical and Rehabilitation Medicine* 2010;42(9):884-90.
12. Nijs J, Meeus M, Van Oosterwijck J, et al. In the mind or in the brain? Scientific evidence for central sensitisation in chronic fatigue syndrome. *Eur J Clin Invest* 2012;42(2):203-12.
13. International Association for the Study of Pain (IASP). Classification of Chronic Pain, Descriptions of chronic Pain Syndromes and Definitions of Pain terms. *Elsevier, Amsterdam* 1986.
14. Wyller VB, Eriksen HR, Malterud K. Can sustained arousal explain the Chronic Fatigue Syndrome? *Behavioral and brain functions : BBF* 2009;5:10.
15. Patel MX, Smith DG, Chalder T, et al. Chronic fatigue syndrome in children: a cross sectional survey. *Arch Dis Child* 2003;88(10):894-8.
16. Rangel L, Garralda ME, Levin M, et al. The course of severe chronic fatigue syndrome in childhood. *J R Soc Med* 2000;93(3):129-34.
17. Wyller VB, Helland IB. Relationship between autonomic cardiovascular control, case definition, clinical symptoms, and functional disability in adolescent chronic fatigue syndrome: an exploratory study. *BioPsychoSocial medicine* 2013;7(1):5.
18. Merskey H, Bogduk, N. Classification of chronic pain . *IASP Task Force on Taxonomy. IASP Press, Seattle* 1994.
19. National Institute of Health and Care Excellence. Chronic fatigue syndrome/myalgic encephalomyelitis (or encephalopathy): Diagnosis and management of CFS/ME in adults and children, 2007.
20. Royal College of Paediatrics and Child Health. *Evidence based guidelines for the management of CFS/ME (chronic fatigue syndrome/myalgic encephalopathy) in children and young adults*. London: Royal College of Paediatrics and Child Health 2004.

- 1
  - 2
  - 3
  - 4
  - 5
  - 6
  - 7
  - 8
  - 9
  - 10
  - 11
  - 12
  - 13
  - 14
  - 15
  - 16
  - 17
  - 18
  - 19
  - 20
  - 21
  - 22
  - 23
  - 24
  - 25
  - 26
  - 27
  - 28
  - 29
  - 30
  - 31
  - 32
  - 33
  - 34
  - 35
  - 36
  - 37
  - 38
  - 39
  - 40
  - 41
  - 42
  - 43
  - 44
  - 45
  - 46
  - 47
  - 48
  - 49
  - 50
  - 51
  - 52
  - 53
  - 54
  - 55
  - 56
  - 57
  - 58
  - 59
  - 60
21. Daut RL, Cleeland CS, Flanery RC. Development of the Wisconsin Brief Pain Questionnaire to assess pain in cancer and other diseases. *Pain* 1983;17(2):197-210.
22. Cleeland CS, Ryan KM. Pain assessment: global use of the Brief Pain Inventory. *Ann Acad Med Singapore* 1994;23(2):129-38.
23. Klepstad P, Loge JH, Borchgrevink PC, et al. The Norwegian Brief Pain Inventory Questionnaire: Translation and Validation in Cancer Pain Patients. *Journal of Pain and Symptom Management* 2002;24(5):517-25.
24. Williams DA, Arnold LM. Measures of fibromyalgia: Fibromyalgia Impact Questionnaire (FIQ), Brief Pain Inventory (BPI), Multidimensional Fatigue Inventory (MFI-20), Medical Outcomes Study (MOS) Sleep Scale, and Multiple Ability Self-Report Questionnaire (MASQ). *Arthritis care & research* 2011;63 Suppl 11:S86-97.
25. Tan G, Jensen MP, Thornby JI, et al. Validation of the brief pain inventory for chronic nonmalignant pain. *The Journal of Pain* 2004;5(2):133-37.
26. Engel J. Pain in Youths With Neuromuscular Disease. *American Journal of Hospice & Palliative Medicine* 2009;26(5):405-12.
27. Roth-Isigkeit A, Raspe HH, Stoven H, et al. [Pain in children and adolescents--results of an exploratory epidemiological study]. *Schmerz* 2003;17(3):171-8.
28. Nie H, Arendt-Nielsen L, Andersen H, et al. Temporal summation of pain evoked by mechanical stimulation in deep and superficial tissue. *J Pain* 2005;6(6):348-55.
29. Ger LP, Ho ST, Sun WZ, et al. Validation of the Brief Pain Inventory in a Taiwanese population. *J Pain Symptom Manage* 1999;18(5):316-22.
30. Meeus M, Nijs J, Huybrechts S, et al. Evidence for generalized hyperalgesia in chronic fatigue syndrome: a case control study. *Clin Rheumatol* 2010;29(4):393-8.
31. Wolfe F, Smythe HA, Yunus MB, et al. The American College of Rheumatology 1990 criteria for the classification of fibromyalgia: Report of the multicenter criteria committee. *Arthritis and rheumatism* 1990;33:160-72.
32. Yarnitsky D. Conditioned pain modulation (the diffuse noxious inhibitory control-like effect): its relevance for acute and chronic pain states. *Current opinion in anaesthesiology* 2010;23(5):611-5.
33. Bell DS, Robinson M, Jordan K. Thirteen-Year Follow-Up of Children and Adolescents With Chronic Fatigue Syndrome. *Pediatrics* 2001;107(5):994.
34. Nielsen CS, Stubhaug A, Price DD, et al. Individual differences in pain sensitivity: Genetic and environmental contributions. *PAIN* 2008;136(1-2):21-29.
35. Turk DC. Cognitive-behavioral approach to the treatment of chronic pain patients. *Regional anesthesia and pain medicine* 2003;28(6):573-9.
36. Wyller VB. The chronic fatigue syndrome – an update. *Acta Neurologica Scandinavica* 2007;115:7-14.
37. Garralda EM, Chalder, T. Practitioner Review: Chronic fatigue syndrome in childhood. *J Child Psychol Psyc* 2005;46(11):1143-51.
38. Haraldstad K, Sorum R, Eide H, et al. Pain in children and adolescents: prevalence, impact on daily life, and parents' perception, a school survey. *Scand J Caring Sci* 2011;25(1):27-36.
39. King S, Chambers CT, Huguet A, et al. The epidemiology of chronic pain in children and adolescents revisited: a systematic review. *Pain* 2011;152(12):2729-38.
40. Hoftun GB, Romundstad PR, Zwart J-A, et al. Chronic idiopathic pain in adolescence – high prevalence and disability: The young HUNT study 2008. *PAIN* 2011;152(10):2259-66.
41. Petersen S, Hagglof BL, Bergstrom EI. Impaired health-related quality of life in children with recurrent pain. *Pediatrics* 2009;124(4):e759-67.
42. Davies S, Crawley E. Chronic fatigue syndrome in children aged 11 years old and younger. *Archives of Disease in Childhood* 2008;93(5):419-22.
43. van de Putte EM, Engelbert RHH, Kuis W, et al. How fatigue is related to other somatic symptoms. *Archives of Disease in Childhood* 2006;91(10):824-27.
44. Whiteside A, Hansen S, Chaudhuri A. Exercise lowers pain threshold in chronic fatigue syndrome. *Pain* 2004;109(3):497-9.
45. Hunfeld JA, Perquin CW, Duivenvoorden HJ, et al. Chronic pain and its impact on quality of life in adolescents and their families. *J Pediatr Psychol* 2001;26(3):145-53.

1  
2  
3  
4  
5  
6  
7  
8  
9  
10  
11  
12  
13  
14  
15  
16  
17  
18  
19  
20  
21  
22  
23  
24  
25  
26  
27  
28  
29  
30  
31  
32  
33  
34  
35  
36  
37  
38  
39  
40  
41  
42  
43  
44  
45  
46  
47  
48  
49  
50  
51  
52  
53  
54  
55  
56  
57  
58  
59  
60

46. Gold JI, Yetwin AK, Mahrer NE, et al. Pediatric chronic pain and health-related quality of life. *J Pediatr Nurs* 2009;24(2):141-50.

47. Winger A, Ekstedt M, Wyller VB, et al. 'Sometimes it feels as if the world goes on without me': adolescents' experiences of living with chronic fatigue syndrome. *J Clin Nurs* 2013.

For peer review only

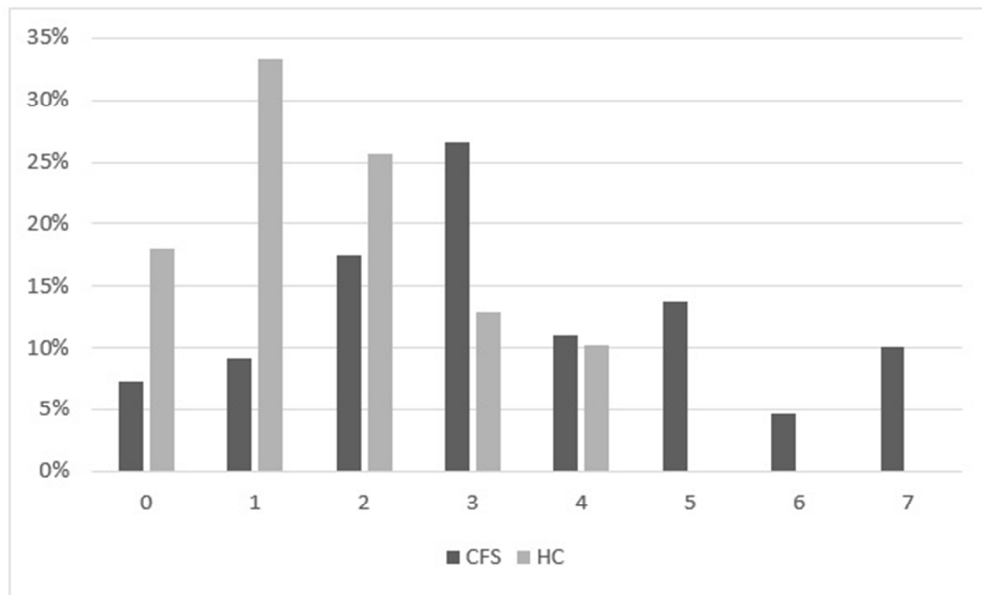

129x77mm (120 x 120 DPI)

review only

1  
2  
3  
4  
5  
6  
7  
8  
9  
10  
11  
12  
13  
14  
15  
16  
17  
18  
19  
20  
21  
22  
23  
24  
25  
26  
27  
28  
29  
30  
31  
32  
33  
34  
35  
36  
37  
38  
39  
40  
41  
42  
43  
44  
45  
46  
47  
48  
49  
50  
51  
52  
53  
54  
55  
56  
57  
58  
59  
60

# BMJ Open

## Pain and Pressure Pain Thresholds in Adolescents with Chronic Fatigue Syndrome and Healthy Controls; a cross sectional study

|                                 |                                                                                                                                                                                                                                                                                                                                                                                                                                                                                                                                                              |
|---------------------------------|--------------------------------------------------------------------------------------------------------------------------------------------------------------------------------------------------------------------------------------------------------------------------------------------------------------------------------------------------------------------------------------------------------------------------------------------------------------------------------------------------------------------------------------------------------------|
| Journal:                        | <i>BMJ Open</i>                                                                                                                                                                                                                                                                                                                                                                                                                                                                                                                                              |
| Manuscript ID:                  | bmjopen-2014-005920.R1                                                                                                                                                                                                                                                                                                                                                                                                                                                                                                                                       |
| Article Type:                   | Research                                                                                                                                                                                                                                                                                                                                                                                                                                                                                                                                                     |
| Date Submitted by the Author:   | 09-Aug-2014                                                                                                                                                                                                                                                                                                                                                                                                                                                                                                                                                  |
| Complete List of Authors:       | Winger, Anette; Oslo and Akershus University College of Applied Sciences, Kvarstein, Gunnvald; University of Tromsø, the Arctic University of Norway, Department of Clinical Medicine<br>Wyller, Vegard; University of Oslo, Medical Faculty<br>Sulheim, Dag; Lillehammer County Hospital, Lillehammer, Department of Pediatrics, Norway<br>Fagermoen, Even; University of Oslo, Medical Faculty<br>Småstuen, Milada; Oslo and Akershus University College of Applied Sciences,<br>Helseth, Sølvi; Oslo and Akershus University College of Applied Sciences, |
| <b>Primary Subject Heading</b>: | Paediatrics                                                                                                                                                                                                                                                                                                                                                                                                                                                                                                                                                  |
| Secondary Subject Heading:      | Public health                                                                                                                                                                                                                                                                                                                                                                                                                                                                                                                                                |
| Keywords:                       | Pain management < ANAESTHETICS, PAIN MANAGEMENT, PUBLIC HEALTH                                                                                                                                                                                                                                                                                                                                                                                                                                                                                               |
|                                 |                                                                                                                                                                                                                                                                                                                                                                                                                                                                                                                                                              |

SCHOLARONE™  
Manuscripts

only

**Title Page****Pain and Pressure Pain Thresholds in Adolescents with Chronic Fatigue Syndrome and Healthy Controls; a cross sectional study**

Anette Winger<sup>1</sup>; RN, MA; Gunnvald Kvarstein<sup>2</sup>; MD, PhD, Professor; Vegard Bruun Wyller; MD, PhD, Professor<sup>3,4,5</sup>; Dag Sulheim; MD<sup>4,6</sup>; Even Fagermoen<sup>3</sup>; MD; Milada Cvancarova Småstuen<sup>1</sup>; MSc, PhD; Sølvi Helseth<sup>1</sup>; RN, PhD, Professor

<sup>1</sup>Institute of Nursing, Faculty of Health Sciences, Oslo and Akershus University College of Applied Sciences, Norway; <sup>2</sup>Department of Clinical Medicine, University of Tromsø, The Arctic University of Norway; <sup>3</sup>Institute of Clinical Medicine, Medical Faculty, University of Oslo, Norway; <sup>4</sup>Department of Pediatrics, Oslo University Hospital, Norway; <sup>5</sup>Department of Pediatrics, Akershus University Hospital, Norway; <sup>6</sup>Department of Pediatrics, Lillehammer County Hospital, Lillehammer, Norway.

**Corresponding author:** Anette Winger, Oslo and Akershus University of Applied Sciences, Postboks 4 St. Olavs plass, NO-0130 Oslo, Norway; telephone: 47 67 23 50 00; e-mail, [anette.winger@hioa.no](mailto:anette.winger@hioa.no)

Abbreviations: BPI- Brief Pain Inventory; CFS-Chronic fatigue syndrome; HC- Healthy Controls; NRS-Numeric Rating Scale; PPT-Pressure Pain Threshold; QoL- Quality of Life

Key Words: adolescents, pain threshold, Chronic fatigue syndrome, public health nurse, and pediatrician

Clinical Trials, NCT01040429; The Norwegian Study of Chronic Fatigue Syndrome in Adolescents: Pathophysiology and Intervention Trial (Nor CAPITAL) [www.clinicaltrials.gov](http://www.clinicaltrials.gov).

Length of article: 3706 words

What's known on this subject: Pain is an important symptom in chronic fatigue syndrome (CFS). However, this pain is poorly understood and little explored in adolescents with CFS.

What does this study add: The study describes the pain prevalence and severity in adolescents with CFS and demonstrates that they are significantly more interfered by pain compared to healthy adolescents in terms of pain frequency, pain severity, functional



interference and pressure pain threshold (PPT).

Pain and Pressure Pain Thresholds in Adolescents with Chronic Fatigue Syndrome and Healthy Controls; a cross sectional study

## ABSTRACT

**Objectives:** Although pain is a significant symptom in Chronic Fatigue Syndrome (CFS), pain is poorly understood in adolescents with CFS. The aim of this study was to explore the pain distribution and prevalence, pain intensity and its functional interference in everyday life, as well as pressure pain thresholds (PPT) in adolescents with CFS, and compare this with a control group of healthy adolescents (HC).

**Methods:** This is a case-control, cross-sectional study on pain including 120 adolescents with CFS and 39 HCs, aged 12 to 18 years. We measured pain frequency, pain severity and pain interference using self-reporting questionnaires. PPT was measured using pressure algometry. Data were collected from March 2010 until October 2012 as part of The Norwegian Study of Chronic Fatigue Syndrome in Adolescents: Pathophysiology and Intervention Trial.

**Results:** Adolescents with CFS had significantly lower PPTs compared to HCs ( $p<0.001$ ). The Pain Severity Score and Pain Interference Score were significantly higher in adolescents with CFS compared to HCs ( $p<0.001$ ). Almost all adolescents with CFS experienced headache, abdominal pain, and/or pain in muscles and joints. Moreover, in all sites the pain intensity levels were significantly higher than in HCs ( $p<0.001$ ).

**Conclusions:** We found a higher prevalence of severe pain among adolescents with CFS and lowered pain thresholds compared to HCs. The mechanisms, however, are still obscure. Large longitudinal population surveys are warranted measuring pain thresholds prior to the onset of CFS.

## Strengths and limitations

- This is one of the first large studies to test and to discuss pressure-provoked pain in both adolescents with CFS and healthy adolescents.
- The relatively large sample of patients together with few missing data strengthen the study and make it possible to generalize the findings. On the other hand, the study only included patients who were able to attend our research clinic; and the results cannot be extrapolated to the most seriously affected CFS adolescents
- The study could have benefitted from a larger sample of healthy controls



## INTRODUCTION

Chronic fatigue syndrome (CFS) is a well-known condition among adolescents, with an estimated prevalence from 0.1% to 1.0%,[1, 2]. However, despite growing research, it is still a poorly understood disorder and there is no general agreement for a reference standard for diagnosis. According to US Centers for Disease Control (CDC-1994), a CFS diagnosis requires three criteria: 1) severe chronic fatigue for six or more consecutive months, 2) fatigue that significantly interferes with daily activities and 3) at least four out of eight accompanying symptoms. Five out of these eight symptoms, are about pain,[3]. For some patients the ongoing pain is even more disabling than fatigue,[4] and is associated with poor physical function,[5]. Although the CDC-1994 criteria for CFS are frequently used, the requirement regarding the number of the accompanying symptoms has been questioned,[6-8]. A recent review found no evidence that any case definitions (diagnostic criteria) for CFS identified patients with specific disease etiology,[9]. For children and adolescents there are specific recommendations with a broad case definition, requiring three months of unexplained disabling, chronic/relapsing fatigue of new onset,[10, 11]. Although some definitions emphasize pain as an important component,[3, 12], this symptom is often ignored by clinicians and researchers,[13], and little progress has been made in understanding the pain component in patients with CFS,[14]. Patients with CFS report increased sensitivity to stimuli like light and sound,[15], and some researchers have hypothesized that the pain is caused by increased sensitivity of the nervous system,[16-18], defined as an “increased responsiveness to normal or sub-threshold input”,[19]. Based upon the theory of the Cognitive activation theory of stress (CATS) the sustained arousal theory was suggested as a mechanism for the development of CFS, resulting in several bodily symptoms, including pain,[20].

Hypersensitivity, measured by means of pressure has been investigated in the adult CFS population, but only with a small number of patients,[18]. To our knowledge, hypersensitivity

1  
2  
3 measured by pressure has been insufficiently studied in adolescents with CFS using a control  
4  
5 group of healthy adolescents. One exception is a study by van de Putte et al. (2005), finding  
6  
7 that there is considerably lowered pressure pain threshold (PPT) in adolescents with CFS  
8  
9 compared to a group of healthy controls,[21]; but, the authors did not discuss the lowered PPT  
10  
11 in adolescents with CFS other than stating the difference. So far, the pain research on  
12  
13 adolescents with CFS has focused on the cluster of symptoms characterizing CFS,[1, 8, 22,  
14  
15 23]. One way to detect if there is an increased sensitivity, is to compare pressure PPT in  
16  
17 symptomatic and asymptomatic areas in CFS patients to HCs,[13]. The International  
18  
19 Association for the Study of Pain's (IASP) definition of pain emphasizes that pain is a  
20  
21 complex concept,[24]. Thus, there is a need for a broad approach to understand pain in  
22  
23 patients with CFS.  
24  
25  
26

27  
28 The aim of this study was to evaluate pain in adolescents with CFS compared to  
29  
30 healthy adolescents, and more specifically explore: 1) the prevalence and location of pain  
31  
32 symptoms, 2) pain severity and its functional interference on everyday life and 3) baseline  
33  
34 pressure pain thresholds (PPTs).  
35  
36

## 37 38 **MATERIAL AND METHODS**

### 39 40 41 **Design**

42  
43 This is a case-control, cross-sectional study, which compares pain (frequency, severity and  
44  
45 interference) and PPTs in adolescents with CFS to a comparable group of healthy adolescents.  
46  
47

48 The study is part of the NorCAPITAL-project (The Norwegian Study of Chronic Fatigue  
49  
50 Syndrome in Adolescents: Pathophysiology and Intervention Trial; Clinical Trials ID:  
51  
52 NCT01040429), which explores possible mechanisms of CFS, the effect of low-dose  
53  
54 clonidine treatment, and patients' experiences in adolescents with CFS,[15].  
55  
56

### 57 58 **Participants**

*CFS patients*

One hundred and twenty adolescents with CFS and 39 adolescents without any known health problem, were recruited between March 2010 and March 2012. All pediatric departments in Norwegian hospitals (n=20), as well as primary care pediatricians and general practitioners, were invited to refer adolescents with CFS (Table 1). The referring units were required to confirm that the patients did not have any medical or psychiatric disorder that might explain the fatigue. In agreement with clinical guidelines,[10, 11] a “broad” case definition with three months of unexplained, disabling fatigue of new onset was required. We did not require any other accompanying symptom criteria to be present. However, we required that the patient a) was unable to follow normal school routines due to fatigue; b) was not permanently bedridden; c) did not use pharmaceuticals (including hormone contraceptives) regularly. Those who fulfilled the pre-specified criteria for inclusion (Table 1) were included in the Nor CAPITAL study. Most participants, (75%), satisfied the Fukuda-criteria from the International Chronic Fatigue Syndrome Study Group,[3]. There are disagreements on the numbers of accompanying symptoms that have to be present for the diagnosis with CFS. At present, there is no evidence for an obvious cut-off for the number of symptoms,[11].

**Table 1.** Criteria for inclusion and exclusion

|                            | <b>CFS patients</b>                                                                                                                                                                                                                          | <b>Healthy control subjects</b>                                        |
|----------------------------|----------------------------------------------------------------------------------------------------------------------------------------------------------------------------------------------------------------------------------------------|------------------------------------------------------------------------|
| <b>Inclusion criteria:</b> | Persisting or constantly relapsing fatigue lasting 3 months or more.<br><br>Functional disability resulting from fatigue to a degree that prevent normal school attendance<br><br>Age $\geq$ 12 and < 18 years                               | Age $\geq$ 12 years and < 18 years                                     |
| <b>Exclusion criteria:</b> | Another current process or chronic disease or demanding life event that might explain the fatigue<br>Permanent use of drugs (including hormones) possibly interfering with measurements<br>Permanently bed-ridden<br>Positive pregnancy test | Another chronic disease<br>Permanent use of drugs (including hormones) |

Pheochromocytoma

Evidence of reduced cerebral and/or peripheral circulation due to vessel disease

Polyneuropathy

Renal insufficiency

Known hypersensitivity towards clonidine or inert substances (lactose, saccharose) in capsula

Abnormal ECG (apart from ectopic beats)

Supine heart rate < 50 beats/min

Supine systolic blood pressure < 85 mmHg

Upright systolic blood pressure fall > 30 mmHg

The criteria are designed for the randomized control trial in the NorCAPITAL-project (The Norwegian Study of Chronic Fatigue Syndrome in Adolescents: Pathophysiology and Intervention Trial; Clinical Trials ID: NCT01040429), which explores possible mechanisms of CFS, the effect of low-dose clonidine treatment, and patients' experiences in adolescents with CFS (9).

**Table 2.** Demographic data and adherence to specific CFS criteria (Fukuda, 1994).

|                                  |              | <b>CFS patients<br/>n-120</b> | <b>controls<br/>n-39</b> |
|----------------------------------|--------------|-------------------------------|--------------------------|
| <b>Male</b>                      | n (%)        | 34 (28)                       | 11 (28.2)                |
| <b>Female</b>                    | n (%)        | 86 (72)                       | 28 (71.8)                |
| <b>Age (years)</b>               | mean (SD)    | 15.4 (1.6)                    | 15.2 (1.6)               |
| <b>Disease duration (months)</b> | mean (range) | 21.4 (4-104)                  | n.a.                     |
| <b>Fukuda-criteria</b>           | n (%)        | 88 (75)                       | n.a.                     |
| <b>Lives with both parents</b>   | n (%)        | 85 (73)                       | 26 (70)                  |
| <b>Parents highest education</b> |              |                               |                          |
| <b>Primary school</b>            | n (%)        | 5 (4.3)                       | 0 (0)                    |
| <b>Secondary school</b>          | n (%)        | 30 (26)                       | 8 (23)                   |
| <b>Lower University</b>          | n (%)        | 34 (29)                       | 9 (23)                   |
| <b>Higher University</b>         | n (%)        | 48 (41)                       | 19 (54)                  |

n=number of individuals

#### *A control group of healthy adolescents*

To recruit a control group of healthy adolescents, information of the study was sent to local schools. Those who replied were given extended information. No regular use of pharmaceuticals was allowed. A group of 39 adolescents, reporting themselves as healthy and normally active and matched on gender and age, was enrolled,[15].

## Measures

### *Brief Pain Inventory (BPI)*

To assess pain, the Brief Pain Inventory (BPI) was used,[25]. BPI assesses the intensities of pain and to what extent pain interferes with different aspects of life,[26]. The Norwegian version of BPI has been validated in cancer pain patients,[27]. The questionnaire has also been validated in several chronic non- malign and musculoskeletal disorders,[28, 29], and in youths with neuromuscular diseases,[30]. The numeric rating scale has been shown appropriate for use with children from 5 years of age,[31]. Modified versions of the BPI interference score has been used in previous studies with participants aged between 8 and 20,[32, 33].

In order to reduce the total burden of questions, we removed the question about pain interference with sleep, and to make it more age-relevant, we asked how pain affected school and homework instead of asking how pain affected work. “Total Pain Severity Score” was expressed as the mean of the four pain intensity items while “Total Pain Interference Score” was obtained by calculating the mean of the seven interference items,[28]. By removing the question about sleep we ended up with six interference scores that were averaged. Internal consistency of the modified questionnaire was assessed with Cronbach’s alpha computed separately for cases and controls. The values were 0.89 and 0.87 for cases and controls, respectively.

Each item from BPI was read aloud by one of the researchers and answered by the participant. In the body diagram of BPI patients were asked to indicate the location of their pain by shading the areas corresponding to painful areas of their own body.

### *CFS questionnaire*

1  
2  
3 A comprehensive CFS questionnaire was constructed and used in the Nor CAPITAL  
4  
5 study,[15], and in the present study, we focused on four questions from this inventory related  
6  
7 to pain: headache, pain in muscles, pain in joint(s), and pain in the abdomen. Frequency of  
8  
9 pain was measured on a five point Likert scale. Single item questions about pain have shown  
10  
11 to be reliable in measuring pain in children and adolescents,[34]. In contrast to the BPI, which  
12  
13 was filled in at the hospital, the CFS inventory was filled in by the participants at home and  
14  
15 returned in pre- stamped envelopes within a few weeks. All measures were done at baseline,  
16  
17 eight weeks after inclusion, and 30 weeks after inclusion. Only the baseline data are presented  
18  
19 here.  
20  
21

### 22 23 24 *Pressure pain threshold*

25  
26 PPT is a reliable variable to test for hyperalgesia in superficial structures like skin, nails and  
27  
28 underlying muscles,[35]. The pain threshold is defined by IASP (1986) as “the minimum  
29  
30 intensity of a stimulus that is perceived as painful.”,[19]. Pressure provoked pain thresholds  
31  
32 were mapped using a commercially available force transducer with a rubber tip of 0.5 cm<sup>2</sup>  
33  
34 (Algometer, JTECH, medical, Salt Lake City, USA). Values are presented in Newton (N).  
35  
36 The intensity was increased until the pressure pain threshold was reached. For each person we  
37  
38 assessed all sites in the same order. We intended to measure PPTs both at places where people  
39  
40 commonly have pain (trapezius and supraspinatus), and places that rarely hurt (fingernails)  
41  
42 and selected three pre-defined sites: 1) the fingernail of the third finger, 2) skin superficial to  
43  
44 the trapezius (ascending part) and 3) supraspinatus muscles bilaterally. Reduced thresholds on  
45  
46 both symptomatic and asymptomatic/remote places may indicate a general sensitization,[18].  
47  
48 To ensure reliability, the pressure stimuli were applied twice to each spot and then averaged, a  
49  
50 procedure that is commonly used in other studies to ensure reliability,[36]. The participants  
51  
52 were instructed to indicate pain threshold by saying, “stop”. In between the two  
53  
54  
55  
56  
57  
58  
59  
60

1  
2  
3 measurements, they filled in the BPI assessment form, which took about ten minutes to  
4  
5 complete. The researcher was not blinded regarding CFS patients and HCs.  
6  
7

### 8 **Ethical considerations**

9  
10  
11 The study was approved by Norwegian Social Science Data Service (NSD) and by the  
12  
13 Norwegian Regional Committee for Medical and Health Research Ethics (REK). Participation  
14  
15 in the project required informed consent by the adolescent and by his or her parents/next-of-  
16  
17 kin, after written and oral information about the study.  
18  
19

### 20 **Statistical analyses**

21  
22  
23 Continuous variables are presented with medians and ranges while categorical variables are  
24  
25 described as counts and percentages. Pain intensity and pain interference were measured on  
26  
27 ordinal scales, and group differences were therefore analyzed by a non- parametric test (Mann  
28  
29 Whitney Wilcoxon-test). For frequency differences between the groups, the Chi-square test  
30  
31 was applied. An average of two pain pressure thresholds measurements were calculated for  
32  
33 three body parts on each body side. As the values were normally distributed in both groups,  
34  
35 they were compared using two-independent samples *t*-test.  
36  
37  
38  
39

40  
41 To assess internal consistency of the instruments, Cronbach's alpha was computed  
42  
43 separately for cases and controls. Alpha >0.7 was considered acceptable,[37]. All tests were  
44  
45 two-sided, and due to multiple testing, only *p*-values<0.01 were considered statistically  
46  
47 significant. All analyses were performed using SPSS, version IBM Statistics 20.  
48  
49

## 50 **RESULTS**

51  
52  
53 In the whole sample (including the CFS and the control group), about 25% were males and  
54  
55 75% females. Mean age was 15.4 years (SD 1.6) for patients and 15.2 (SD 1.6) for HCs.  
56  
57 There were almost no missing data in any of the data sets (details are given in Tables 3 and 4).  
58  
59  
60

There were no statistically significant differences between cases and controls concerning possible confounders (age, BMI and gender distribution), and there was no difference between patients and controls regarding socioeconomic status (Table 2).

**Table 3.** Frequency of pain episodes in different locations among CFS patients and healthy controls

| Frequency          | CFS patients n= 120 (%) |         |         |         | Healthy controls n=39 (%) |         |         |         |
|--------------------|-------------------------|---------|---------|---------|---------------------------|---------|---------|---------|
|                    | Head                    | Abdomen | Joints  | Muscles | Head                      | Abdomen | Joints  | Muscles |
| <b>0-1 t/mo</b>    | 9 (8)                   | 30 (25) | 36 (30) | 21 (18) | 18 (46)                   | 20 (51) | 35 (90) | 26 (67) |
| <b>2-3 t/mo</b>    | 28 (23)                 | 30 (25) | 19 (16) | 20 (17) | 14 (36)                   | 15 (39) | 2(5)    | 7 (18)  |
| <b>1-2 t/w</b>     | 28 (23)                 | 21 (18) | 24 (20) | 24 (20) | 4 (10)                    | 1 (3)   | 0       | 2 (5)   |
| <b>3-5 t/w</b>     | 20 (17)                 | 21 (18) | 15 (13) | 17 (14) | 0                         | 1 (3)   | 0       | 1 (3)   |
| <b>~ every day</b> | 32 (27)                 | 15 (13) | 23 (20) | 34 (28) | 1 (3)                     | 0       | 0       | 1 (3)   |
| <b>Missing (%)</b> | 2.5                     | 2.5     | 2.5     | 3.3     | 5.1                       | 5.1     | 5.1     | 5.1     |

Group comparisons for different pain sites (head, abdomen, joints and muscles);  $p < 0.001$  for all four sites  
mo= month, w= week

**Table 4.** Pain Intensity, Severity and Interference scores among CFS patients and healthy controls

|                                      | CFS patients |                | Healthy controls |                | <i>p</i> -value* |
|--------------------------------------|--------------|----------------|------------------|----------------|------------------|
|                                      | n            | Median (Range) | n                | Median (Range) |                  |
| <b>Pain worst</b>                    | 117          | 6 (0-10)       | 39               | 3 (0-10)       |                  |
| <b>Pain least</b>                    | 118          | 1 (0-7)        | 39               | 0 (0-7)        |                  |
| <b>Pain average</b>                  | 118          | 5 (0-9)        | 39               | 3 (0-6)        |                  |
| <b>Pain now</b>                      | 118          | 2 (0-8)        | 39               | 0 (0-7)        |                  |
| <b>Total Pain Severity score</b>     | 117          | 14,5 (0-31)    | 39               | 6 (0-23)       | <0.001           |
| <b>Interference to:</b>              |              |                |                  |                |                  |
| <b>General activity</b>              | 118          | 4 (0-10)       | 39               | 1 (0-8)        |                  |
| <b>Mood</b>                          | 118          | 3 (0-9)        | 39               | 1 (0-8)        |                  |
| <b>Walking</b>                       | 118          | 2 (0-10)       | 39               | 0 (0-7)        |                  |
| <b>School</b>                        | 118          | 4 (0-10)       | 39               | 0 (0-8)        |                  |
| <b>Relation to others</b>            | 118          | 2 (0-9)        | 39               | 0 (0-8)        |                  |
| <b>Enjoy of life</b>                 | 118          | 2 (0-9)        | 39               | 0 (0-10)       |                  |
| <b>Total Pain Interference score</b> | 118          | 17 (0-49)      | 39               | 4 (0-36)       | <0.001           |

\*Statistical group comparisons; Mann- Whitney- Wilcoxon test

### Pain prevalence and distribution

The frequency data from the CFS Symptom Inventory showed that adolescents with CFS were weekly seriously influenced by pain (Table 3). Summing up the categories 3, 4 and 5 in Table 3 (1-2t/w, 3-5t/w and ~every day), almost all adolescents with CFS vs. one third of the HCs reported pain during the previous week, and the group difference was highly significant.



Headache was most common (67% reported weekly attacks), followed by muscle pain (62%), pain in joints (53%), and abdominal pain (49%). Headache was also the most reported pain in HCs (13%), followed by pain in muscles (11%) and abdominal pain (6%). No HCs reported pain in joints as a problem on a weekly basis. Studying the body map, almost 30% of the patients with CFS marked more than four sites as painful while none of the HCs did (Table 5).

**Table 5.** Number of body sites mapped as painful among CFS patients and healthy controls

|                   | CFS Patients<br>n=117 | Healthy controls<br>n=39 |
|-------------------|-----------------------|--------------------------|
| 0 locations n (%) | 8 (7)                 | 7 (18)                   |
| 1 location n (%)  | 13 (11)               | 13 (33)                  |
| 2 locations n (%) | 19 (16)               | 10 (10)                  |
| 3 locations n (%) | 30 (26)               | 5 (5)                    |
| 4 locations n (%) | 13 (11)               | 4 (10)                   |
| 5 locations n (%) | 17 (15)               | 0 (0)                    |
| 6 locations n (%) | 6 (5)                 | 0 (0)                    |
| 7 locations n (%) | 11 (9)                | 0 (0)                    |

n=number of individuals. The located areas shaded are head, neck/shoulder, chest, back, abdomen, upper limb, lower limb. Only the counted number of locations are presented in the table.

### Pain severity and functional interference

CFS patients demonstrated higher Pain Severity Scores ( $p < 0.001$ ) and Pain Interference scores ( $p < 0.001$ ) than HCs. Among the CFS patients, pain interfered most with attendance at school and general activity (Table 4). Ability to enjoy life, however, was one of the life domains that was least affected by pain, both among CFS patients and HCs, but it is important to notice that 8.4% of the adolescents with CFS scored above seven on this item. Three HCs scored high ( $\geq 8$ ) on pain severity while four on pain interference, reflecting the large variation in the normal population.

### Pressure pain thresholds

At all measure points, PPT were significantly lower (all  $p < 0.001$ ) among CFS patients than HCs. For the trapezius muscle the mean values were 15.4, 95%CI [14.1- 16.8] and 24.5,

1  
2  
3 95%CI [21.0- 28.0] for cases and controls, respectively. On fingernails 18.5, 95%CI [16.9-  
4  
5 20.0] for cases and 30.8, 95%CI [26.5- 35.4] for controls. Concerning supraspinatus muscle  
6  
7 the mean values were 17.1, 95%CI [15.6-18.6] for cases and 27.7, 95%CI [23.3- 31.6] for  
8  
9 controls. The values show that PPT was as much as 50% lower in patients with CFS than in  
10  
11 HCs, both at locations that usually are painful (muscles) and in areas that usually are not  
12  
13 reported painful (finger nails). There were no missing data for HCs and for CFS patients' data  
14  
15 was missing for one individual.  
16  
17

## 18 19 **DISCUSSION**

20  
21  
22 This study shows that adolescents with CFS have significantly lower pain thresholds than a  
23  
24 comparable control group of healthy adolescents. The study also demonstrates that  
25  
26 adolescents with CFS are severely troubled by pain, and that pain has great functional  
27  
28 consequences. A more unexpected finding is the lower pain interference on joy of life for the  
29  
30 patients.  
31  
32

### 33 34 **Hypersensitivity**

35  
36  
37 The significantly lower PPTs among adolescents with CFS compared with HCs in both  
38  
39 symptomatic and asymptomatic places could indicate a more general sensitization of the  
40  
41 nervous system,[38]. Lowered PPT in asymptomatic areas, indicating general sensitization,  
42  
43 has also been found in patients with Ehler-Danlos syndrome,[36]. General hypersensitivity  
44  
45 has been suggested as a reason for pain among CFS patients, as it has for chronic widespread  
46  
47 pain,[16] and fibromyalgia,[39]. Our own research group found significantly higher  
48  
49 sensitivity scores among adolescents with CFS and hypothesizes that the hypersensitivity  
50  
51 could be an effect of sustained arousal,[15]. Other researchers have highlighted altered pain  
52  
53 inhibition as a potential factor in patients with generalized pain,[40]. Patients with CFS have  
54  
55 also reported being more sensitive to other sensory stimulations like light and sound,[15, 41].  
56  
57  
58  
59  
60

1  
2  
3 Thus, it might be the case that adolescents with CFS are more sensitive to several types of  
4  
5 sensory stimuli. On the other hand, it should be born in mind that lowered PPT only reflects  
6  
7 increased sensitivity to mechanical stimuli, and do not predict the response to, for instance,  
8  
9 thermal stimuli.  
10

11  
12  
13 Researchers have suggested that CFS patients are genetically more prone to develop  
14  
15 the disease,[20], in line with epidemiological data on chronic pain,[42]. The factors and  
16  
17 processes for pain among CFS patients remain unclear, but in other populations, pain beliefs,  
18  
19 emotions, understanding of pain and psychosocial factors have been found to influence the  
20  
21 perception of pain,[43]. In patient with fibromyalgia Turk et al. (2003) showed that fear of  
22  
23 movement maintains the pain experience and increases the disability,[43]. The model on pain-  
24  
25 related fear and avoidance suggests this as essential for perpetuation of pain,[44], and among  
26  
27 adults with CFS, Nijs et al. (2008) demonstrate a clear association between pain  
28  
29 catastrophizing, pain severity and activity limitation/participation,[45]. There is no obvious  
30  
31 reason to believe that this is not the case for adolescents with CFS. Negative thoughts may  
32  
33 also develop when the patients do not understand the etiology of pain,[36]. A qualitative study  
34  
35 suggests that multiple perspectives, including individual differences, developmental and  
36  
37 relational focus, should be taken into account when treating and studying young persons with  
38  
39 CFS,[46]. Cognitive behavior therapy for CFS has shown to be effective in improving fatigue  
40  
41 and pain in both adult and adolescents,[4]. A multidimensional perspective of CFS, opposing  
42  
43 the dichotomy between bodily and mental processes and acknowledging the impact of  
44  
45 cognitive processes on physiological responses, is supported by previous studies,[47, 48], and  
46  
47 is in line with the sustained arousal theory,[20].  
48  
49  
50  
51  
52

53  
54 More knowledge about pain and the relation to increased sensitivity before and  
55  
56 throughout the process of the illness might provide a better understanding of CFS. Except  
57  
58 from one study (published as editorial letter 2013), showing improvement in pain and pain  
59  
60

1  
2  
3 threshold after successful cognitive behavior therapy,[49], we are not aware of other  
4  
5 published studies focusing on this aspect in adolescents with CFS.  
6  
7

### 8 **Frequency of Pain**

9  
10  
11 In the present study, almost three quarter of the adolescents with CFS suffered from weekly  
12  
13 pain, and pain on a daily basis was a problem for half of the patients. HCs also reported pain  
14  
15 on weekly bases, but the rate was much lower. Pain is indeed a common problem among  
16  
17 teenagers in general,[50-53]; in a large Norwegian health survey 10% of healthy adolescents  
18  
19 reported pain on a daily basis, and 19% were troubled by musculoskeletal or abdominal  
20  
21 pain,[52]. In our study, nearly half of the adolescents with CFS reported abdominal pain every  
22  
23 week. Such a high proportion of recurrent abdominal pain has also been reported in a study on  
24  
25 CFS adolescents from the UK,[54]. These authors demonstrated in another study the same  
26  
27 somatic symptoms among HCs and adolescents with CFS, although with a lower degree of  
28  
29 severity in HCs,[55]; headache and sore muscles were among the top ten bodily complaints.  
30  
31 Our study confirm these findings. Adolescents with CFS report pain in the same places as the  
32  
33 HCs do, although the pain frequency is higher. In both groups, headache is the most common  
34  
35 pain followed by abdominal pain.  
36  
37  
38  
39

40  
41 The largest group difference in the present study was joint pain. Of the HCs, only 10%  
42  
43 reported joint pain more frequently than once a month, vs. 70% of the adolescents with CFS.  
44  
45

### 46 **Pain severity and interference in daily life**

47  
48  
49 From healthy controls we know that physical activity has an important pain protective  
50  
51 effect,[52], and Crawley and Stern (2009) have shown that impaired physical function is  
52  
53 associated with higher levels of fatigue, pain and low mood,[5]. Complicating this, pain  
54  
55 thresholds in patients with CFS have been found to decrease after physical exercises,[56],  
56  
57  
58  
59  
60

1  
2  
3 which may lead to a fear avoidance behavior. This phenomenon illustrates how several  
4  
5 contributing factors may influence the pain condition.  
6  
7

8           Although average Pain Severity Scores were relatively moderate in the CFS group  
9  
10 (table 4), health care providers should bear in mind that the total sum of pain and fatigue over  
11  
12 time might represent a heavy burden with serious long term consequences,[48]. Large studies  
13  
14 on children and adolescents, pain has demonstrated substantial reductions in quality of life  
15  
16 (QOL),[50, 57, 58]. In our study, the adolescents reported that pain interfered with school,  
17  
18 general activity and mood; however, we cannot conclude from this study that pain has a  
19  
20 causal effect, because it could be the other way around. Particularly interference with school  
21  
22 attendance has been shown to strongly affect QOL in adolescents with CFS,[55, 59]. Some of  
23  
24 our patients felt it was difficult to assess the interference of pain, and to separate what was  
25  
26 caused by fatigue and what was caused by pain, and the second part of BPI (mapping the  
27  
28 interference of pain) has for that reason been criticized,[27]. Although the participants were  
29  
30 told to concentrate on pain and not the fatigue, we realize that QOL is most likely to be  
31  
32 affected by both.  
33  
34  
35  
36  
37

38           It is important to bear in mind that the economical differences between social classes  
39  
40 are not as pronounced in the Norwegian society as in other Western societies, and all  
41  
42 individuals in Norway have equal access to medical care and using level of education as a  
43  
44 surrogate for social class, we still found no difference between the two groups.  
45  
46

### 47 **Strengths and limitations**

48  
49  
50 This is one of the first studies to include a broader focus on pain in adolescents with CFS, and  
51  
52 to test pressure-provoked pain in both adolescents with CFS and in healthy adolescents. The  
53  
54 relatively large sample of patients together with few missing data strengthen the study,  
55  
56 making it possible to generalize the results. The wide inclusion criteria suggest  
57  
58  
59  
60

1  
2  
3 generalizability to the population of adolescents with CFS referred to pediatric care. Only two  
4  
5 patients reported a short disease duration between three and six months,[15], and the results  
6  
7 should be generalizable to populations with a more persistent CFS condition (more than six  
8  
9 months). The Nor CAPITAL study did have one clear selection bias, as the study only  
10  
11 included patients who were able to attend our research clinic; and the results cannot be  
12  
13 extrapolated to the most seriously affected CFS adolescents. One question from the original  
14  
15 BPI questionnaire was removed and this might have affected the psychometric property.  
16  
17 However, Cronbach's alpha computed for BPI interference scores demonstrated strong  
18  
19 internal consistency for both cases and controls. The results could have been influenced by  
20  
21 confounding factors like anxiety and depression. In a previous paper from our research group,  
22  
23 on the same group of patients, however, we did not find depression to be a confounding  
24  
25 factor,[15]. The control group of adolescents is smaller than the CFS group, and the study  
26  
27 might have benefited from a larger sample of controls. Power calculation from a previous  
28  
29 study,[47], however, gives reasons to assume that our samples were sufficient to discover  
30  
31 significantly and clinically interesting group differences,[15].  
32  
33  
34  
35  
36

## 37 **CONCLUSION**

38  
39  
40 We found a higher prevalence of severe pain among adolescents with CFS and lowered pain  
41  
42 thresholds compared to healthy controls. The total sum of bodily symptoms represented a  
43  
44 heavy burden with great functional consequences. The large sample of patients together with  
45  
46 few missing data strengthen the study, making it possible to generalize the results.  
47  
48  
49  
50  
51  
52  
53  
54  
55  
56  
57  
58  
59  
60

## Acknowledgments

Kari Gjersum, Berit Widerøe Njølstad, Adelheid Holm, Marianne Svendsen, Anne Marie Halstensen, Kristin Villa, Esther Gangsø, Hamsana Chandrakumar, Anna Marie Thorendal Ryenbakken all participants and their parents/next-of-kin.

The information reported in this manuscript has not been presented in any other journal.

The authors have no financial relationship nor any other conflict of interest to disclose.

## Contributors' Statements Page

The following persons are qualified for authorship:

Even Fagermoen: MD Fagermoen conceptualized and designed the study, acquired data and critically revised the manuscript for important intellectual content and approved the final manuscript as submitted

Sølvi Helseth: Professor Helseth conceptualized and designed the study, analyzed and interpreted data, drafted the manuscript, critically revised the manuscript for important intellectual content, obtained funding and approved the final manuscript as submitted

Gunnvald Kvarstein: Professor Kvarstein conceptualized and designed the study, analyzed and interpreted data, drafted the manuscript, critically revised the manuscript for important intellectual content and approved the final manuscript as submitted

Milada Cvancarova Småstuen: Dr. Småstuen analyzed and interpreted data, carried out the statistical analyzes, critically revised the manuscript for important intellectual content and approved the final manuscript as submitted

Dag Sulheim: MD Sulheim conceptualized and designed the study, acquired data and critically revised the manuscript for important intellectual content and approved the final manuscript as submitted

Anette Winger: PhD-student Winger conceptualized and designed the study, acquired data, analyzed and interpreted data, drafted the manuscript and critically revised the manuscript for important intellectual content, carried out the statistical analyzes, obtained funding and approved the final manuscript as submitted.

Vegard Bruun Wyller: Professor Wyller conceptualized and designed the study, critically revised the manuscript for important intellectual content, obtained funding and approved the final manuscript as submitted

Acknowledgments:

Kari Gjersum provided secretarial assistance, Berit Widerøe Njølstad, MA; Adelheid Holm, RN; Marianne Svendsen, BSc; Anne Marie Halstensen, RN; Kristin Villa, RN; Esther Gangsø, BSc; Hamsana Chandrakumar, BSc and Anna Marie Thorendal Ryenbakken provided practical assistance.

1  
2  
3 Competing interests: To the author's knowledge, no conflict of interest, financial or other,  
4 exists.  
5

6 Funding/Support: As part of the Nor CAPITAL-project this study was funded by Health  
7 South-East Hospital Trust, the University of Oslo, Oslo and Akershus University College of  
8 Applied Sciences, the Norwegian Competence Network of Pediatric Pharmacotherapy, Simon  
9 Fougner Hartman's Family Foundation, and Eckbo's Family Foundation funded this study.  
10  
11

12 Role of the Sponsor: The sponsors had no role in the design and conduct of the study;  
13 collection, management, analysis, or interpretation of the data; preparation, review, or  
14 approval of the manuscript; and decision to submit the manuscript for publication.  
15  
16

17 Data Sharing Statement: No additional data available.  
18  
19  
20  
21  
22  
23  
24  
25  
26  
27  
28  
29  
30  
31  
32  
33  
34  
35  
36  
37  
38  
39  
40  
41  
42  
43  
44  
45  
46  
47  
48  
49  
50  
51  
52  
53  
54  
55  
56  
57  
58  
59  
60



## References

1. Nijhof SL, Maijer K, Bleijenberg G, et al. Adolescent chronic fatigue syndrome: prevalence, incidence, and morbidity. *Pediatrics* 2011;127(5):e1169-75.
2. Crawley EM, Emond AM, Sterne JA. Unidentified Chronic Fatigue Syndrome/myalgic encephalomyelitis (CFS/ME) is a major cause of school absence: surveillance outcomes from school-based clinics. *BMJ open* 2011;1(2):e000252.
3. Fukuda K, Straus SE, Hickie I, et al. The Chronic Fatigue Syndrome: A Comprehensive Approach to Its Definition and Study. *Annals of Internal Medicine* 1994;121(12):953.
4. Knoop H, Stulemeijer M, Prins JB, et al. Is cognitive behaviour therapy for chronic fatigue syndrome also effective for pain symptoms? *Behaviour Research And Therapy* 2007;45(9):2034-43.
5. Crawley E, Sterne JA. Association between school absence and physical function in paediatric chronic fatigue syndrome/myalgic encephalopathy. *Archives of Disease in Childhood* 2009;94(10):752-56.
6. Nisenbaum R, Reyes M, Unger ER, et al. Factor analysis of symptoms among subjects with unexplained chronic fatigue: what can we learn about chronic fatigue syndrome? *J Psychosom Res* 2004;56(2):171-8.
7. Sullivan PF, Pedersen NL, Jacks A, et al. Chronic fatigue in a population sample: definitions and heterogeneity. *Psychol Med* 2005;35(9):1337-48.
8. Wyller VB, Helland IB. Relationship between autonomic cardiovascular control, case definition, clinical symptoms, and functional disability in adolescent chronic fatigue syndrome: an exploratory study. *BioPsychoSocial medicine* 2013;7(1):5.
9. Brurberg KG, Fonhus MS, Larun L, et al. Case definitions for chronic fatigue syndrome/myalgic encephalomyelitis (CFS/ME): a systematic review. *BMJ open* 2014;4(2):e003973.
10. Royal College of Paediatrics and Child Health. *Evidence based guidelines for the management of CFS/ME (chronic fatigue syndrome/myalgic encephalopathy) in children and young adults*. London: Royal College of Paediatrics and Child Health 2004.
11. National Institute of Health and Care Excellence. *Chronic fatigue syndrome/myalgic encephalomyelitis (or encephalopathy): Diagnosis and management of CFS/ME in adults and children, 2007*.
12. Carruthers BM, van de Sande MI, De Meirleir KL, et al. Myalgic encephalomyelitis: International Consensus Criteria. *J Intern Med* 2011;270(4):327-38.
13. Nijs J, Crombez G, Meeus M, et al. Pain in patients with chronic fatigue syndrome: time for specific pain treatment? *Pain physician* 2012;15(5):E677-86.
14. Meeus M, Nijs J, Meirleir KD. Chronic musculoskeletal pain in patients with the chronic fatigue syndrome: a systematic review. *European Journal Of Pain (London, England)* 2007;11(4):377-86.
15. Sulheim D, Fagermoen E, Winger A, et al. Disease Mechanisms and Clonidine Treatment in Adolescent Chronic Fatigue Syndrome: A Combined Cross-sectional and Randomized Clinical Trial. *JAMA pediatrics* 2014.
16. Meeus M, Nijs J. Central sensitization: a biopsychosocial explanation for chronic widespread pain in patients with fibromyalgia and chronic fatigue syndrome. *Clinical Rheumatology* 2007;26(4):465-73.
17. Meeus M, Roussel NA, Truijien S, et al. Reduced pressure pain thresholds in response to exercise in chronic fatigue syndrome but not in chronic low back pain: an experimental study. *Journal of rehabilitation medicine : official journal of the UEMS European Board of Physical and Rehabilitation Medicine* 2010;42(9):884-90.
18. Nijs J, Meeus M, Van Oosterwijck J, et al. In the mind or in the brain? Scientific evidence for central sensitisation in chronic fatigue syndrome. *Eur J Clin Invest* 2012;42(2):203-12.

19. International Association for the Study of Pain (IASP). Classification of Chronic Pain, Descriptions of chronic Pain Syndromes and Definitions of Pain terms. *Elsevier, Amsterdam* 1986.
20. Wyller VB, Eriksen HR, Malterud K. Can sustained arousal explain the Chronic Fatigue Syndrome? *Behavioral and brain functions : BBF* 2009;5:10.
21. Van De Putte EM, Uiterwaal CSPM, Bots ML, et al. Is Chronic Fatigue Syndrome a Connective Tissue Disorder? A Cross-Sectional Study in Adolescents. *Pediatrics* 2005;115(4):e415-e22.
22. Patel MX, Smith DG, Chalder T, et al. Chronic fatigue syndrome in children: a cross sectional survey. *Arch Dis Child* 2003;88(10):894-8.
23. Rangel L, Garralda ME, Levin M, et al. The course of severe chronic fatigue syndrome in childhood. *J R Soc Med* 2000;93(3):129-34.
24. Merskey H, Bogduk, N. Classification of chronic pain . *IASP Task Force on Taxonomy. IASP Press, Seattle* 1994.
25. Daut RL, Cleeland CS, Flanery RC. Development of the Wisconsin Brief Pain Questionnaire to assess pain in cancer and other diseases. *Pain* 1983;17(2):197-210.
26. Cleeland CS, Ryan KM. Pain assessment: global use of the Brief Pain Inventory. *Ann Acad Med Singapore* 1994;23(2):129-38.
27. Klepstad P, Loge JH, Borchgrevink PC, et al. The Norwegian Brief Pain Inventory Questionnaire: Translation and Validation in Cancer Pain Patients. *Journal of Pain and Symptom Management* 2002;24(5):517-25.
28. Williams DA, Arnold LM. Measures of fibromyalgia: Fibromyalgia Impact Questionnaire (FIQ), Brief Pain Inventory (BPI), Multidimensional Fatigue Inventory (MFI-20), Medical Outcomes Study (MOS) Sleep Scale, and Multiple Ability Self-Report Questionnaire (MASQ). *Arthritis care & research* 2011;63 Suppl 11:S86-97.
29. Tan G, Jensen MP, Thornby JI, et al. Validation of the brief pain inventory for chronic nonmalignant pain. *The Journal of Pain* 2004;5(2):133-37.
30. Engel J. Pain in Youths With Neuromuscular Disease. *American Journal of Hospice & Palliative Medicine* 2009;26(5):405-12.
31. Gaffney A, McGrath, P. J., & Dick, B. Measuring pain in children: Developmental and instrumental issues. In: N. L. Schechter CBB, & M. Yaster (Eds.), ed. Pain in infants, children, and adolescents. Philadelphia: Lippincott Williams & Wilkins, 2003.
32. Engel JM, Jensen MP, Ciol MA, et al. The development and preliminary validation of the pediatric survey of pain attitudes. *American journal of physical medicine & rehabilitation / Association of Academic Physiatrists* 2012;91(2):114-21.
33. Engel JM, Petrina TJ, Dudgeon BJ, et al. Cerebral palsy and chronic pain: a descriptive study of children and adolescents. *Physical & occupational therapy in pediatrics* 2005;25(4):73-84.
34. Roth-Isigkeit A, Raspe HH, Stoven H, et al. [Pain in children and adolescents--results of an exploratory epidemiological study]. *Schmerz* 2003;17(3):171-8.
35. Nie H, Arendt-Nielsen L, Andersen H, et al. Temporal summation of pain evoked by mechanical stimulation in deep and superficial tissue. *J Pain* 2005;6(6):348-55.
36. Rombaut L, Scheper M, De Wandele I, et al. Chronic pain in patients with the hypermobility type of Ehlers-Danlos syndrome: evidence for generalized hyperalgesia. *Clin Rheumatol* 2014.
37. Ger LP, Ho ST, Sun WZ, et al. Validation of the Brief Pain Inventory in a Taiwanese population. *J Pain Symptom Manage* 1999;18(5):316-22.
38. Meeus M, Nijs J, Huybrechts S, et al. Evidence for generalized hyperalgesia in chronic fatigue syndrome: a case control study. *Clin Rheumatol* 2010;29(4):393-8.
39. Wolfe F, Smythe HA, Yunus MB, et al. The American College of Rheumatology 1990 criteria for the classification of fibromyalgia: Report of the multicenter criteria committee. *Arthritis and rheumatism* 1990;33:160-72.
40. Yarnitsky D. Conditioned pain modulation (the diffuse noxious inhibitory control-like effect): its relevance for acute and chronic pain states. *Current opinion in anaesthesiology* 2010;23(5):611-5.
41. Bell DS, Robinson M, Jordan K. Thirteen-Year Follow-Up of Children and Adolescents With Chronic Fatigue Syndrome. *Pediatrics* 2001;107(5):994.

- 1  
2  
3 42. Nielsen CS, Stubhaug A, Price DD, et al. Individual differences in pain sensitivity: Genetic and environmental contributions. *PAIN* 2008;136(1–2):21-29.
- 4 43. Turk DC. Cognitive-behavioral approach to the treatment of chronic pain patients. *Regional anesthesia and pain medicine* 2003;28(6):573-9.
- 5 44. Vlaeyen JW, Linton SJ. Fear-avoidance and its consequences in chronic musculoskeletal pain: a state of the art. *Pain* 2000;85(3):317-32.
- 6 45. Nijs J, Van de Putte K, Louckx F, et al. Exercise performance and chronic pain in chronic fatigue syndrome: the role of pain catastrophizing. *Pain Med* 2008;9(8):1164-72.
- 7 46. Hareide L, Finset A, Wyller VB. Chronic fatigue syndrome: a qualitative investigation of young patient's beliefs and coping strategies. *Disability and Rehabilitation* 2011;33(23-24):2255-63.
- 8 47. Wyller VB. The chronic fatigue syndrome – an update. *Acta Neurologica Scandinavica* 2007;115:7-14.
- 9 48. Garralda EM, Chalder, T. Practitioner Review: Chronic fatigue syndrome in childhood. *J Child Psychol Psyc* 2005;46(11):1143-51.
- 10 49. Nijhof SL, Priesterbach LP, Bleijenberg G, et al. Functional Improvement Is Accompanied by Reduced Pain in Adolescent Chronic Fatigue Syndrome. *Pain Medicine* 2013;14(9):1435-38.
- 11 50. Haraldstad K, Sorum R, Eide H, et al. Pain in children and adolescents: prevalence, impact on daily life, and parents' perception, a school survey. *Scand J Caring Sci* 2011;25(1):27-36.
- 12 51. King S, Chambers CT, Huguet A, et al. The epidemiology of chronic pain in children and adolescents revisited: a systematic review. *Pain* 2011;152(12):2729-38.
- 13 52. Hoftun GB, Romundstad PR, Zwart J-A, et al. Chronic idiopathic pain in adolescence – high prevalence and disability: The young HUNT study 2008. *PAIN* 2011;152(10):2259-66.
- 14 53. Petersen S, Hagglof BL, Bergstrom EI. Impaired health-related quality of life in children with recurrent pain. *Pediatrics* 2009;124(4):e759-67.
- 15 54. Davies S, Crawley E. Chronic fatigue syndrome in children aged 11 years old and younger. *Archives of Disease in Childhood* 2008;93(5):419-22.
- 16 55. van de Putte EM, Engelbert RHH, Kuis W, et al. How fatigue is related to other somatic symptoms. *Archives of Disease in Childhood* 2006;91(10):824-27.
- 17 56. Whiteside A, Hansen S, Chaudhuri A. Exercise lowers pain threshold in chronic fatigue syndrome. *Pain* 2004;109(3):497-9.
- 18 57. Hunfeld JA, Perquin CW, Duivenvoorden HJ, et al. Chronic pain and its impact on quality of life in adolescents and their families. *J Pediatr Psychol* 2001;26(3):145-53.
- 19 58. Gold JI, Yetwin AK, Mahrer NE, et al. Pediatric chronic pain and health-related quality of life. *J Pediatr Nurs* 2009;24(2):141-50.
- 20 59. Winger A, Ekstedt M, Wyller VB, et al. 'Sometimes it feels as if the world goes on without me': adolescents' experiences of living with chronic fatigue syndrome. *J Clin Nurs* 2013.
- 21  
22  
23  
24  
25  
26  
27  
28  
29  
30  
31  
32  
33  
34  
35  
36  
37  
38  
39  
40  
41  
42  
43  
44  
45  
46  
47  
48  
49  
50  
51  
52  
53  
54  
55  
56  
57  
58  
59  
60

## Title Page

### **Pain and Pressure Pain Thresholds in Adolescents with Chronic Fatigue Syndrome and Healthy Controls; a cross sectional study**

Anette Winger<sup>1</sup>; RN, MA; Gunnvald Kvarstein<sup>2</sup>; MD, PhD, Professor; Vegard Bruun Wyller; MD, PhD, Professor<sup>3,4,5</sup>; Dag Sulheim; MD<sup>4,6</sup>; Even Fagermoen<sup>3</sup>; MD; Milada Cvancarova Småstuen<sup>1</sup>; MSc, PhD; Sølvi Helseth<sup>1</sup>; RN, PhD, Professor

<sup>1</sup>Institute of Nursing, Faculty of Health Sciences, Oslo and Akershus University College of Applied Sciences, Norway; <sup>2</sup>Department of Clinical Medicine, University of Tromsø, The Arctic University of Norway; <sup>3</sup>Institute of Clinical Medicine, Medical Faculty, University of Oslo, Norway; <sup>4</sup>Department of Pediatrics, Oslo University Hospital, Norway; <sup>5</sup>Department of Pediatrics, Akershus University Hospital, Norway; <sup>6</sup>Department of Pediatrics, Lillehammer County Hospital, Lillehammer, Norway.

**Corresponding author:** Anette Winger, Oslo and Akershus University of Applied Sciences, Postboks 4 St. Olavs plass, NO-0130 Oslo, Norway; telephone: 47 67 23 50 00; e-mail, [anette.winger@hioa.no](mailto:anette.winger@hioa.no)

Abbreviations: BPI- Brief Pain Inventory; CFS-Chronic fatigue syndrome; HC- Healthy Controls; NRS-Numeric Rating Scale; PPT-Pressure Pain Threshold; QoL- Quality of Life

Key Words: adolescents, pain threshold, Chronic fatigue syndrome, public health nurse, and pediatrician

Clinical Trials, NCT01040429; The Norwegian Study of Chronic Fatigue Syndrome in Adolescents: Pathophysiology and Intervention Trial (Nor CAPITAL) [www.clinicaltrials.gov](http://www.clinicaltrials.gov).

Length of article: 3706 words

What's known on this subject: Pain is an important symptom in chronic fatigue syndrome (CFS). However, this pain is poorly understood and little explored in adolescents with CFS.

What does this study add: The study describes the pain prevalence and severity in adolescents with CFS and demonstrates that they are significantly more interfered by pain compared to healthy adolescents in terms of pain frequency, pain severity, functional

interference and pressure pain threshold (PPT).

Pain and Pressure Pain Thresholds in Adolescents with Chronic Fatigue Syndrome and Healthy Controls; a cross sectional study

## ABSTRACT

**Background and objectives:** Although pain is a significant symptom in Chronic Fatigue Syndrome (CFS), pain is poorly understood in adolescents with CFS. The aim of this study was to explore the pain distribution and prevalence, pain intensity and its functional interference in everyday life, as well as pressure pain thresholds (PPT) in adolescents with CFS, and compare this with a control group of healthy adolescents (HC).

**Methods:** This is a case-control, cross-sectional study on pain including 120 adolescents with CFS and 39 HCs, aged 12 to 18 years. We measured pain frequency, pain severity and pain interference using self-reporting questionnaires. PPT was measured using pressure algometry. Data were collected from March 2010 until October 2012 as part of The Norwegian Study of Chronic Fatigue Syndrome in Adolescents: Pathophysiology and Intervention Trial.

**Results:** Adolescents with CFS had significantly lower PPTs compared to HCs ( $p<0.001$ ). The Pain Severity Score and Pain Interference Score were significantly higher in adolescents with CFS compared to HCs ( $p<0.001$ ). Almost all adolescents with CFS experienced headache, abdominal pain, and/or pain in muscles and joints. Moreover, in all sites the pain intensity levels were significantly higher than in HCs ( $p<0.001$ ).

**Conclusions:** We found a higher prevalence of severe pain among adolescents with CFS and lowered pain thresholds compared to HCs. The mechanisms, however, are still obscure. Large longitudinal population surveys are warranted measuring pain thresholds prior to the onset of CFS.

## Strengths and limitations

- This is **one of** the first **large** studies to test **and to discuss** pressure-provoked pain in both adolescents with CFS and healthy adolescents.
- The relatively large sample of patients together with few missing data strengthen the study **and make it possible to generalize the findings**. **On the other hand**, the study only included patients who were able to attend our research clinic; and the results cannot be extrapolated to the most seriously affected CFS adolescents
- The study could have benefitted from a larger sample of healthy controls



## INTRODUCTION

Chronic fatigue syndrome (CFS) is a well-known condition among adolescents, with an estimated prevalence from 0.1% to 1.0%, [1, 2]. However, despite growing research, it is still a poorly understood disorder and there is no general agreement for a reference standard for diagnosis. According to US Centers for Disease Control (CDC-1994), a CFS diagnosis requires three criteria: 1) severe chronic fatigue for six or more consecutive months, 2) fatigue that significantly interferes with daily activities and 3) at least four out of eight accompanying symptoms. Five out of these eight symptoms, are about pain, [3]. For some patients the ongoing pain is even more disabling than fatigue, [4] and is associated with poor physical function, [5]. Although the CDC-1994 criteria for CFS are frequently used, the requirement regarding the number of the accompanying symptoms has been questioned, [6-8]. A recent review found no evidence that any case definitions (diagnostic criteria) for CFS identified patients with specific disease etiology, [9]. For children and adolescents there are specific recommendations with a broad case definition, requiring three months of unexplained disabling, chronic/relapsing fatigue of new onset, [10, 11]. Although some definitions emphasize pain as an important component, [3, 12], this symptom is often ignored by clinicians and researchers, [13], and little progress has been made in understanding the pain component in patients with CFS, [14]. Patients with CFS report increased sensitivity to stimuli like light and sound, [15], and some researchers have hypothesized that the pain is caused by increased sensitivity of the nervous system, [16-18], defined as an “increased responsiveness to normal or sub-threshold input”, [19]. Based upon the theory of the Cognitive activation theory of stress (CATS) the sustained arousal theory was suggested as a mechanism for the development of CFS, resulting in several bodily symptoms, including pain, [20].

Hypersensitivity, measured by means of pressure has been investigated in the adult CFS population, but only with a small number of patients, [18]. To our knowledge, hypersensitivity

1  
2  
3 measured by pressure has been insufficiently studied in adolescents with CFS using a control  
4 group of healthy adolescents. One exception is a study by van de Putte et al. (2005), finding  
5 that there is considerably lowered pressure pain threshold (PPT) in adolescents with CFS  
6 compared to a group of healthy controls,[21]; but, the authors did not discuss the lowered PPT  
7 in adolescents with CFS other than stating the difference. So far, the pain research on  
8 adolescents with CFS has focused on the cluster of symptoms characterizing CFS,[1, 8, 22,  
9 23]. One way to detect if there is an increased sensitivity, is to compare pressure PPT in  
10 symptomatic and asymptomatic areas in CFS patients to HCs,[13]. The International  
11 Association for the Study of Pain's (IASP) definition of pain emphasizes that pain is a  
12 complex concept,[24]. Thus, there is a need for a broad approach to understand pain in  
13 patients with CFS.

14  
15  
16  
17  
18  
19  
20  
21  
22  
23  
24  
25  
26  
27  
28 The aim of this study was to evaluate pain in adolescents with CFS compared to  
29 healthy adolescents, and more specifically explore: 1) the prevalence and location of pain  
30 symptoms, 2) pain severity and its functional interference on everyday life and 3) baseline  
31 pressure pain thresholds (PPTs).

## 32 33 34 35 36 37 38 **MATERIAL AND METHODS**

### 39 40 41 **Design**

42  
43  
44 This is a case-control, cross-sectional study, which compares pain (frequency, severity and  
45 interference) and PPTs in adolescents with CFS to a comparable group of healthy adolescents.

46  
47  
48 The study is part of the NorCAPITAL-project (The Norwegian Study of Chronic Fatigue  
49 Syndrome in Adolescents: Pathophysiology and Intervention Trial; Clinical Trials ID:  
50 NCT01040429), which explores possible mechanisms of CFS, the effect of low-dose  
51 clonidine treatment, and patients' experiences in adolescents with CFS,[15].  
52  
53  
54  
55  
56  
57

### 58 59 60 **Participants**

*CFS patients*

One hundred and twenty adolescents with CFS and 39 adolescents without any known health problem, were recruited between March 2010 and March 2012. All pediatric departments in Norwegian hospitals (n=20), as well as primary care pediatricians and general practitioners, were invited to refer adolescents with CFS (Table 1). The referring units were required to confirm that the patients did not have any medical or psychiatric disorder that might explain the fatigue. In agreement with clinical guidelines,[10, 11] a “broad” case definition with three months of unexplained, disabling fatigue of new onset was required. We did not require any other accompanying symptom criteria to be present. However, we required that the patient a) was unable to follow normal school routines due to fatigue; b) was not permanently bedridden; c) did not use pharmaceuticals (including hormone contraceptives) regularly. Those who fulfilled the pre-specified criteria for inclusion (Table 1) were included in the Nor CAPITAL study. Most participants, (75%), satisfied the Fukuda-criteria from the International Chronic Fatigue Syndrome Study Group,[3]. There are disagreements on the numbers of accompanying symptoms that have to be present for the diagnosis with CFS. At present, there is no evidence for an obvious cut-off for the number of symptoms,[11].

**Table 1.** Criteria for inclusion and exclusion

|                            | <b>CFS patients</b>                                                                                                                                                                                                                          | <b>Healthy control subjects</b>                                        |
|----------------------------|----------------------------------------------------------------------------------------------------------------------------------------------------------------------------------------------------------------------------------------------|------------------------------------------------------------------------|
| <b>Inclusion criteria:</b> | Persisting or constantly relapsing fatigue lasting 3 months or more.<br><br>Functional disability resulting from fatigue to a degree that prevent normal school attendance<br><br>Age $\geq$ 12 and < 18 years                               | Age $\geq$ 12 years and < 18 years                                     |
| <b>Exclusion criteria:</b> | Another current process or chronic disease or demanding life event that might explain the fatigue<br>Permanent use of drugs (including hormones) possibly interfering with measurements<br>Permanently bed-ridden<br>Positive pregnancy test | Another chronic disease<br>Permanent use of drugs (including hormones) |



Pheochromocytoma

Evidence of reduced cerebral and/or peripheral circulation due to vessel disease

Polyneuropathy

Renal insufficiency

Known hypersensitivity towards clonidine or inert substances (lactose, saccharose) in capsula

Abnormal ECG (apart from ectopic beats)

Supine heart rate < 50 beats/min

Supine systolic blood pressure < 85 mmHg

Upright systolic blood pressure fall > 30 mmHg

The criteria are designed for the randomized control trial in the NorCAPITAL-project (The Norwegian Study of Chronic Fatigue Syndrome in Adolescents: Pathophysiology and Intervention Trial; Clinical Trials ID: NCT01040429), which explores possible mechanisms of CFS, the effect of low-dose clonidine treatment, and patients' experiences in adolescents with CFS (9).

**Table 2.** Demographic data and adherence to specific CFS criteria (Fukuda, 1994).

|                                  |              | <b>CFS patients</b><br><b>n-120</b> | <b>controls</b><br><b>n-39</b> |
|----------------------------------|--------------|-------------------------------------|--------------------------------|
| <b>Male</b>                      | n (%)        | 34 (28)                             | 11 (28.2)                      |
| <b>Female</b>                    | n (%)        | 86 (72)                             | 28 (71.8)                      |
| <b>Age (years)</b>               | mean (SD)    | 15.4 (1.6)                          | 15.2 (1.6)                     |
| <b>Disease duration (months)</b> | mean (range) | 21.4 (4-104)                        | n.a.                           |
| <b>Fukuda-criteria</b>           | n (%)        | 88 (75)                             | n.a.                           |
| <b>Lives with both parents</b>   | n (%)        | 85 (73)                             | 26 (70)                        |
| <b>Parents highest education</b> |              |                                     |                                |
| <b>Primary school</b>            | n (%)        | 5 (4.3)                             | 0 (0)                          |
| <b>Secondary school</b>          | n (%)        | 30 (26)                             | 8 (23)                         |
| <b>Lower University</b>          | n (%)        | 34 (29)                             | 9 (23)                         |
| <b>Higher University</b>         | n (%)        | 48 (41)                             | 19 (54)                        |

n=number of individuals

#### *A control group of healthy adolescents*

To recruit a control group of healthy adolescents, information of the study was sent to local schools. Those who replied were given extended information. No regular use of pharmaceuticals was allowed. A group of 39 adolescents, reporting themselves as healthy and normally active and matched on gender and age, was enrolled,[15].

## Measures

### *Brief Pain Inventory (BPI)*

To assess pain, the Brief Pain Inventory (BPI) was used,[25]. BPI assesses the intensities of pain and to what extent pain interferes with different aspects of life,[26]. The Norwegian version of BPI has been validated in cancer pain patients,[27]. The questionnaire has also been validated in several chronic non- malign and musculoskeletal disorders,[28, 29], and in youths with neuromuscular diseases,[30]. **The numeric rating scale has been shown appropriate for use with children from 5 years of age,[31]. Modified versions of the BPI interference score has been used in previous studies with participants aged between 8 and 20,[32, 33].**

In order to reduce the total burden of questions, we removed the question about pain interference with sleep, and to make it more age-relevant, we asked how pain affected school and homework instead of asking how pain affected work. “Total Pain Severity Score” was expressed as the mean of the four pain intensity items while “Total Pain Interference Score” was obtained by calculating the mean of the seven interference items,[28]. By removing the question about sleep we ended up with six interference scores that were averaged. Internal consistency of the modified questionnaire was assessed with Cronbach’s alpha computed separately for cases and controls. The values were 0.89 and 0.87 for cases and controls, respectively.

Each item from BPI was read aloud by one of the researchers and answered by the participant. In the body diagram of BPI patients were asked to indicate the location of their pain by shading the areas corresponding to painful areas of their own body.

### *CFS questionnaire*

1  
2  
3 A comprehensive CFS questionnaire was constructed and used in the Nor CAPITAL  
4  
5 study,[15], and in the present study, we focused on four questions from this inventory related  
6  
7 to pain: headache, pain in muscles, pain in joint(s), and pain in the abdomen. Frequency of  
8  
9 pain was measured on a five point Likert scale. Single item questions about pain have shown  
10  
11 to be reliable in measuring pain in children and adolescents,[34]. In contrast to the BPI, which  
12  
13 was filled in at the hospital, the CFS inventory was filled in by the participants at home and  
14  
15 returned in pre- stamped envelopes within a few weeks. All measures were done at baseline,  
16  
17 eight weeks after inclusion, and 30 weeks after inclusion. Only the baseline data are presented  
18  
19 here.  
20  
21

### 22 23 24 *Pressure pain threshold*

25  
26 PPT is a reliable variable to test for hyperalgesia in superficial structures like skin, nails and  
27  
28 underlying muscles,[35]. The pain threshold is defined by IASP (1986) as “the minimum  
29  
30 intensity of a stimulus that is perceived as painful.”,[19]. Pressure provoked pain thresholds  
31  
32 were mapped using a commercially available force transducer with a rubber tip of 0.5 cm<sup>2</sup>  
33  
34 (Algometer, JTECH, medical, Salt Lake City, USA). Values are presented in Newton (N).  
35  
36 The intensity was increased until the pressure pain threshold was reached. For each person we  
37  
38 assessed all sites in the same order. We intended to measure PPTs both at places where people  
39  
40 commonly have pain (trapezius and supraspinatus), and places that rarely hurt (fingernails)  
41  
42 and selected three pre-defined sites: 1) the fingernail of the third finger, 2) skin superficial to  
43  
44 the trapezius (ascending part) and 3) supraspinatus muscles bilaterally. Reduced thresholds on  
45  
46 both symptomatic and asymptomatic/remote places may indicate a general sensitization,[18].  
47  
48 **To ensure reliability**, the pressure stimuli were applied twice to each spot **and then averaged, a**  
49  
50 **procedure that is commonly used in other studies to ensure reliability,[36]**. The participants  
51  
52 were instructed to indicate pain threshold by saying, “stop”. In between the two  
53  
54  
55  
56  
57  
58  
59  
60

1  
2  
3 measurements, they filled in the BPI assessment form, which took about ten minutes to  
4  
5 complete. **The researcher was not blinded regarding CFS patients and HCs.**  
6  
7

### 8 **Ethical considerations**

9  
10  
11 The study was approved by Norwegian Social Science Data Service (NSD) and by the  
12  
13 Norwegian Regional Committee for Medical and Health Research Ethics (REK). Participation  
14  
15 in the project required informed consent by the adolescent and by his or her parents/next-of-  
16  
17 kin, after written and oral information about the study.  
18  
19

### 20 **Statistical analyses**

21  
22  
23 Continuous variables are presented with medians and ranges while categorical variables are  
24  
25 described as counts and percentages. Pain intensity and pain interference were measured on  
26  
27 ordinal scales, and group differences were therefore analyzed by a non- parametric test (Mann  
28  
29 Whitney Wilcoxon-test). For frequency differences between the groups, the Chi-square test  
30  
31 was applied. An average of two pain pressure thresholds measurements were calculated for  
32  
33 three body parts on each body side. As the values were normally distributed in both groups,  
34  
35 they were compared using two-independent samples *t*-test.  
36  
37  
38  
39

40  
41 To assess internal consistency of the instruments, Cronbach's alpha was computed  
42  
43 separately for cases and controls. Alpha >0.7 was considered acceptable,[37]. All tests were  
44  
45 two-sided, and due to multiple testing, only *p*-values<0.01 were considered statistically  
46  
47 significant. All analyses were performed using SPSS, version IBM Statistics 20.  
48  
49

## 50 **RESULTS**

51  
52  
53 In the whole sample (including the CFS and the control group), about 25% were males and  
54  
55 75% females. Mean age was 15.4 years (SD 1.6) for patients and 15.2 (SD 1.6) for HCs.  
56  
57 There were almost no missing data in any of the data sets (details are given in Tables 3 and 4).  
58  
59  
60

There were no statistically significant differences between cases and controls concerning possible confounders (age, BMI and gender distribution), and there was no difference between patients and controls regarding socioeconomic status (Table 2).

**Table 3.** Frequency of pain episodes in different locations among CFS patients and healthy controls

| Frequency          | CFS patients n= 120 (%) |         |         |         | Healthy controls n=39 (%) |         |         |         |
|--------------------|-------------------------|---------|---------|---------|---------------------------|---------|---------|---------|
|                    | Head                    | Abdomen | Joints  | Muscles | Head                      | Abdomen | Joints  | Muscles |
| <b>0-1 t/mo</b>    | 9 (8)                   | 30 (25) | 36 (30) | 21 (18) | 18 (46)                   | 20 (51) | 35 (90) | 26 (67) |
| <b>2-3 t/mo</b>    | 28 (23)                 | 30 (25) | 19 (16) | 20 (17) | 14 (36)                   | 15 (39) | 2(5)    | 7 (18)  |
| <b>1-2 t/w</b>     | 28 (23)                 | 21 (18) | 24 (20) | 24 (20) | 4 (10)                    | 1 (3)   | 0       | 2 (5)   |
| <b>3-5 t/w</b>     | 20 (17)                 | 21 (18) | 15 (13) | 17 (14) | 0                         | 1 (3)   | 0       | 1 (3)   |
| <b>~ every day</b> | 32 (27)                 | 15 (13) | 23 (20) | 34 (28) | 1 (3)                     | 0       | 0       | 1 (3)   |
| <b>Missing (%)</b> | 2.5                     | 2.5     | 2.5     | 3.3     | 5.1                       | 5.1     | 5.1     | 5.1     |

Group comparisons for different pain sites (head, abdomen, joints and muscles);  $p < 0.001$  for all four sites  
mo= month, w= week

**Table 4.** Pain Intensity, Severity and Interference scores among CFS patients and healthy controls

|                                      | CFS patients |                | Healthy controls |                | <i>p</i> -value* |
|--------------------------------------|--------------|----------------|------------------|----------------|------------------|
|                                      | n            | Median (Range) | n                | Median (Range) |                  |
| <b>Pain worst</b>                    | 117          | 6 (0-10)       | 39               | 3 (0-10)       |                  |
| <b>Pain least</b>                    | 118          | 1 (0-7)        | 39               | 0 (0-7)        |                  |
| <b>Pain average</b>                  | 118          | 5 (0-9)        | 39               | 3 (0-6)        |                  |
| <b>Pain now</b>                      | 118          | 2 (0-8)        | 39               | 0 (0-7)        |                  |
| <b>Total Pain Severity score</b>     | 117          | 14,5 (0-31)    | 39               | 6 (0-23)       | <0.001           |
| <b>Interference to:</b>              |              |                |                  |                |                  |
| <b>General activity</b>              | 118          | 4 (0-10)       | 39               | 1 (0-8)        |                  |
| <b>Mood</b>                          | 118          | 3 (0-9)        | 39               | 1 (0-8)        |                  |
| <b>Walking</b>                       | 118          | 2 (0-10)       | 39               | 0 (0-7)        |                  |
| <b>School</b>                        | 118          | 4 (0-10)       | 39               | 0 (0-8)        |                  |
| <b>Relation to others</b>            | 118          | 2 (0-9)        | 39               | 0 (0-8)        |                  |
| <b>Enjoy of life</b>                 | 118          | 2 (0-9)        | 39               | 0 (0-10)       |                  |
| <b>Total Pain Interference score</b> | 118          | 17 (0-49)      | 39               | 4 (0-36)       | <0.001           |

\*Statistical group comparisons; Mann- Whitney- Wilcoxon test

### Pain prevalence and distribution

The frequency data from the CFS Symptom Inventory showed that adolescents with CFS were weekly seriously influenced by pain (Table 3). Summing up the categories 3, 4 and 5 in Table 3 (1-2t/w, 3-5t/w and ~every day), almost all adolescents with CFS vs. one third of the HCs reported pain during the previous week, and the group difference was highly significant.

Headache was most common (67% reported weekly attacks), followed by muscle pain (62%), pain in joints (53%), and abdominal pain (49%). Headache was also the most reported pain in HCs (13%), followed by pain in muscles (11%) and abdominal pain (6%). No HCs reported pain in joints as a problem on a weekly basis. Studying the body map, almost 30% of the patients with CFS marked more than four sites as painful while none of the HCs did (Table 5).

**Table 5.** Number of body sites mapped as painful among CFS patients and healthy controls

|                          | <b>CFS Patients</b><br>n=117 | <b>Healthy controls</b><br>n=39 |
|--------------------------|------------------------------|---------------------------------|
| <b>0 locations n (%)</b> | 8 (7)                        | 7 (18)                          |
| <b>1 location n (%)</b>  | 13 (11)                      | 13 (33)                         |
| <b>2 locations n (%)</b> | 19 (16)                      | 10 (10)                         |
| <b>3 locations n (%)</b> | 30 (26)                      | 5 (5)                           |
| <b>4 locations n (%)</b> | 13 (11)                      | 4 (10)                          |
| <b>5 locations n (%)</b> | 17 (15)                      | 0 (0)                           |
| <b>6 locations n (%)</b> | 6 (5)                        | 0 (0)                           |
| <b>7 locations n (%)</b> | 11 (9)                       | 0 (0)                           |

n=number of individuals. The located areas shaded are head, neck/shoulder, chest, back, abdomen, upper limb, lower limb. Only the counted number of locations are presented in the table.

### **Pain severity and functional interference**

CFS patients demonstrated higher Pain Severity Scores ( $p < 0.001$ ) and Pain Interference scores ( $p < 0.001$ ) than HCs. Among the CFS patients, pain interfered most with attendance at school and general activity (Table 4). Ability to enjoy life, however, was one of the life domains that was least affected by pain, both among CFS patients and HCs, but it is important to notice that 8.4% of the adolescents with CFS scored above seven on this item. Three HCs scored high ( $\geq 8$ ) on pain severity while four on pain interference, reflecting the large variation in the normal population.

### **Pressure pain thresholds**

At all measure points, PPT were significantly lower (all  $p < 0.001$ ) among CFS patients than HCs. For the trapezius muscle the mean values were 15.4, 95%CI [14.1- 16.8] and 24.5,

1  
2  
3 95%CI [21.0- 28.0] for cases and controls, respectively. On fingernails 18.5, 95%CI [16.9-  
4  
5 20.0] for cases and 30.8, 95%CI [26.5- 35.4] for controls. Concerning supraspinatus muscle  
6  
7 the mean values were 17.1, 95%CI [15.6-18.6] for cases and 27.7, 95%CI [23.3- 31.6] for  
8  
9 controls. The values show that PPT was as much as 50% lower in patients with CFS than in  
10  
11 HCs, both at locations that usually are painful (muscles) and in areas that usually are not  
12  
13 reported painful (finger nails). There were no missing data for HCs and for CFS patients' data  
14  
15 was missing for one individual.  
16  
17

## 18 19 **DISCUSSION**

20  
21  
22 This study shows that adolescents with CFS have significantly lower pain thresholds than a  
23  
24 comparable control group of healthy adolescents. The study also demonstrates that  
25  
26 adolescents with CFS are severely troubled by pain, and that pain has great functional  
27  
28 consequences. A more unexpected finding is the lower pain interference on joy of life for the  
29  
30 patients.  
31  
32

### 33 34 **Hypersensitivity**

35  
36  
37 **The** significantly lower PPTs among adolescents with CFS compared with HCs in both  
38  
39 symptomatic and asymptomatic places could indicate a more general sensitization of the  
40  
41 nervous system,[38]. **Lowered PPT in asymptomatic areas, indicating general sensitization,**  
42  
43 **has also been found in patients with Ehler-Danlos syndrome,[36].** General hypersensitivity  
44  
45 has been suggested as a reason for pain among CFS patients, as it has for chronic widespread  
46  
47 pain,[16] and fibromyalgia,[39]. Our own research group found significantly higher  
48  
49 sensitivity scores among adolescents with CFS and hypothesizes that the hypersensitivity  
50  
51 could be an effect of sustained arousal,[15]. Other researchers have highlighted altered pain  
52  
53 inhibition as a potential factor in patients with generalized pain,[40]. Patients with CFS have  
54  
55 also reported being more sensitive to other sensory stimulations like light and sound,[15, 41].  
56  
57  
58  
59  
60

1  
2  
3 Thus, it might be the case that adolescents with CFS are more sensitive to **several** types of  
4 sensory stimuli. On the other hand, it should be born in mind that lowered PPT only reflects  
5 increased sensitivity to mechanical stimuli, and do not predict the response to, for instance,  
6 thermal stimuli.  
7  
8  
9  
10

11  
12  
13 Researchers have suggested that CFS patients are genetically more prone to develop  
14 the disease,[20], in line with epidemiological **data on** chronic pain,[42]. The factors and  
15 processes for pain among CFS patients remain unclear, but in other populations, pain beliefs,  
16 **emotions**, understanding of pain and psychosocial factors have been found to influence the  
17 perception of pain,[43]. In patient with fibromyalgia Turk et al. (2003) showed that fear of  
18 movement maintains the pain experience and increases the disability,[43]. **The model on pain-**  
19 **related fear and avoidance suggests this as essential for perpetuation of pain,[44], and among**  
20 **adults with CFS, Nijs et al. (2008) demonstrate a clear association between pain**  
21 **catastrophizing, pain severity and activity limitation/participation,[45].** There is no obvious  
22 reason to believe that this is not the case for adolescents with CFS. **Negative thoughts may**  
23 **also develop when the patients do not understand the etiology of pain,[36].** A qualitative study  
24 **suggests that multiple perspectives, including individual differences, developmental and**  
25 **relational focus, should be taken into account when treating and studying young persons with**  
26 **CFS,[46].** Cognitive behavior therapy for CFS has shown to be effective in improving fatigue  
27 **and pain in both adult and adolescents,[4].** A multidimensional perspective of CFS, opposing  
28 the dichotomy between bodily and mental processes and acknowledging the impact of  
29 cognitive processes on physiological responses, is supported by previous studies,[47, 48], and  
30 is in line with the sustained arousal theory,[20].  
31  
32  
33  
34  
35  
36  
37  
38  
39  
40  
41  
42  
43  
44  
45  
46  
47  
48  
49  
50  
51  
52

53  
54 More knowledge about pain and the relation to increased sensitivity before and  
55 throughout the process of the illness might provide a better understanding of CFS. **Except**  
56 **from one study (published as editorial letter 2013), showing improvement in pain and pain**  
57  
58  
59  
60



1  
2  
3 threshold after successful cognitive behavior therapy,[49], we are not aware of other  
4  
5 published studies focusing on this aspect in adolescents with CFS.  
6  
7

### 8 **Frequency of Pain**

9  
10  
11 In the present study, almost three quarter of the adolescents with CFS suffered from weekly  
12  
13 pain, and pain on a daily basis was a problem for half of the patients. HCs also reported pain  
14  
15 on weekly bases, but the rate was much lower. Pain is indeed a common problem among  
16  
17 teenagers in general,[50-53]; in a large Norwegian health survey 10% of healthy adolescents  
18  
19 reported pain on a daily basis, and 19% were troubled by musculoskeletal or abdominal  
20  
21 pain,[52]. In our study, nearly half of the adolescents with CFS reported abdominal pain every  
22  
23 week. Such a high proportion of recurrent abdominal pain has also been reported in a study on  
24  
25 CFS adolescents from the UK,[54]. These authors demonstrated in another study the same  
26  
27 somatic symptoms among HCs and adolescents with CFS, although with a lower degree of  
28  
29 severity in HCs,[55]; headache and sore muscles were among the top ten bodily complaints.  
30  
31 Our study confirm these findings. Adolescents with CFS report pain in the same places as the  
32  
33 HCs do, although the pain frequency is higher. In both groups, headache is the most common  
34  
35 pain followed by abdominal pain.  
36  
37  
38  
39

40  
41 The largest group difference in the present study was joint pain. Of the HCs, only 10%  
42  
43 reported joint pain more frequently than once a month, vs. 70% of the adolescents with CFS.  
44  
45

### 46 **Pain severity and interference in daily life**

47  
48  
49 From healthy controls we know that physical activity has an important pain protective  
50  
51 effect,[52], and Crawley and Stern (2009) have shown that impaired physical function is  
52  
53 associated with higher levels of fatigue, pain and low mood,[5]. Complicating this, pain  
54  
55 thresholds in patients with CFS have been found to decrease after physical exercises,[56],  
56  
57  
58  
59  
60

1  
2  
3 which may lead to a fear avoidance behavior. This phenomenon illustrates how several  
4  
5 contributing factors may influence the pain condition.  
6  
7

8           Although average Pain Severity Scores were relatively moderate in the CFS group  
9  
10 (table 4), health care providers should bear in mind that the total sum of pain and fatigue over  
11  
12 time might represent a heavy burden with serious long term consequences,[48]. Large studies  
13  
14 on children and adolescents, pain has demonstrated substantial reductions in quality of life  
15  
16 (QOL),[50, 57, 58]. In our study, the adolescents reported that pain interfered with school,  
17  
18 general activity and mood; however, we cannot conclude from this study that pain has a  
19  
20 causal effect, because it could be the other way around. Particularly interference with school  
21  
22 attendance has been shown to strongly affect QOL in adolescents with CFS,[55, 59]. Some of  
23  
24 our patients felt it was difficult to assess the interference of pain, and to separate what was  
25  
26 caused by fatigue and what was caused by pain, and the second part of BPI (mapping the  
27  
28 interference of pain) has for that reason been criticized,[27]. Although the participants were  
29  
30 told to concentrate on pain and not the fatigue, we realize that QOL is most likely to be  
31  
32 affected by both.  
33  
34  
35  
36  
37

38           It is important to bear in mind that the economical differences between social classes  
39  
40 are not as pronounced in the Norwegian society as in other Western societies, and all  
41  
42 individuals in Norway have equal access to medical care and using level of education as a  
43  
44 surrogate for social class, we still found no difference between the two groups.  
45  
46

### 47 **Strengths and limitations**

48  
49  
50 This is one of the first studies to include a broader focus on pain in adolescents with CFS, and  
51  
52 to test pressure-provoked pain in both adolescents with CFS and in healthy adolescents. The  
53  
54 relatively large sample of patients together with few missing data strengthen the study,  
55  
56 making it possible to generalize the results. The wide inclusion criteria suggest  
57  
58  
59  
60

1  
2  
3 generalizability to the population of adolescents with CFS referred to pediatric care. Only two  
4  
5 patients reported a short disease duration between three and six months,[15], and the results  
6  
7 should be generalizable to populations with a more persistent CFS condition (more than six  
8  
9 months). The Nor CAPITAL study did have one clear selection bias, as the study only  
10  
11 included patients who were able to attend our research clinic; and the results cannot be  
12  
13 extrapolated to the most seriously affected CFS adolescents. One question from the original  
14  
15 BPI questionnaire was removed and this might have affected the psychometric property.  
16  
17 However, Cronbach's alpha computed for BPI interference scores demonstrated strong  
18  
19 internal consistency for both cases and controls. The results could have been influenced by  
20  
21 confounding factors like anxiety and depression. In a previous paper from our research group,  
22  
23 on the same group of patients, however, we did not find depression to be a confounding  
24  
25 factor,[15]. The control group of adolescents is smaller than the CFS group, and the study  
26  
27 might have benefited from a larger sample of controls. Power calculation from a previous  
28  
29 study,[47], however, gives reasons to assume that our samples were sufficient to discover  
30  
31 significantly and clinically interesting group differences,[15].  
32  
33  
34  
35  
36

## 37 CONCLUSION

38  
39  
40 We found a higher prevalence of severe pain among adolescents with CFS and lowered pain  
41  
42 thresholds compared to healthy controls. The total sum of bodily symptoms represented a  
43  
44 heavy burden with great functional consequences. The large sample of patients together with  
45  
46 few missing data strengthen the study, making it possible to generalize the results.  
47  
48

## 49 Acknowledgments

50  
51  
52 Kari Gjersum, Berit Widerøe Njølstad, Adelheid Holm, Marianne Svendsen, Anne Marie  
53  
54 Halstensen, Kristin Villa, Esther Gangsø, Hamsana Chandrakumar, Anna Marie Thorendal  
55  
56 Ryenbakken all participants and their parents/next-of-kin.  
57  
58  
59  
60

1  
2  
3 The information reported in this manuscript has not been presented in any other journal.

4  
5 The authors have no financial relationship nor any other conflict of interest to disclose.  
6  
7  
8  
9

## 10 **Contributors' Statements Page**

11  
12 The following persons are qualified for authorship:

13  
14 Even Fagermoen: MD Fagermoen conceptualized and designed the study, acquired data and  
15 critically revised the manuscript for important intellectual content and approved the final  
16 manuscript as submitted

17  
18 Sølvi Helseth: Professor Helseth conceptualized and designed the study, analyzed and  
19 interpreted data, drafted the manuscript, critically revised the manuscript for important  
20 intellectual content, obtained funding and approved the final manuscript as submitted

21  
22 Gunnvald Kvarstein: Professor Kvarstein conceptualized and designed the study, analyzed and  
23 interpreted data, drafted the manuscript, critically revised the manuscript for important  
24 intellectual content and approved the final manuscript as submitted

25  
26 Milada Cvancarova Småstuen: Dr. Småstuen analyzed and interpreted data, carried out the  
27 statistical analyzes, critically revised the manuscript for important intellectual content and  
28 approved the final manuscript as submitted

29  
30 Dag Sulheim: MD Sulheim conceptualized and designed the study, acquired data and critically  
31 revised the manuscript for important intellectual content and approved the final manuscript as  
32 submitted

33  
34 Anette Winger: PhD-student Winger conceptualized and designed the study, acquired data,  
35 analyzed and interpreted data, drafted the manuscript and critically revised the manuscript for  
36 important intellectual content, carried out the statistical analyzes, obtained funding and  
37 approved the final manuscript as submitted.

38  
39 Vegard Bruun Wyller: Professor Wyller conceptualized and designed the study, critically  
40 revised the manuscript for important intellectual content, obtained funding and approved the  
41 final manuscript as submitted

42  
43 Acknowledgments:

44  
45 Kari Gjersum provided secretarial assistance, Berit Widerøe Njølstad, MA; Adelheid Holm,  
46 RN; Marianne Svendsen, BSc; Anne Marie Halstensen, RN; Kristin Villa, RN; Esther  
47 Gangsø, BSc; Hamsana Chandrakumar, BSc and Anna Marie Thorendal Ryebakken  
48 provided practical assistance.

49  
50 Competing interests: To the author's knowledge, no conflict of interest, financial or other,  
51 exists.  
52

53  
54 Funding/Support: As part of the Nor CAPITAL-project this study was funded by Health  
55 South-East Hospital Trust, the University of Oslo, Oslo and Akershus University College of  
56 Applied Sciences, the Norwegian Competence Network of Pediatric Pharmacotherapy, Simon  
57 Fougner Hartman's Family Foundation, and Eckbo's Family Foundation funded this study.  
58  
59  
60

1  
2  
3 Role of the Sponsor: The sponsors had no role in the design and conduct of the study;  
4 collection, management, analysis, or interpretation of the data; preparation, review, or  
5 approval of the manuscript; and decision to submit the manuscript for publication.  
6

7 No additional data available.  
8

## 9 References

- 10 1. Nijhof SL, Maijer K, Bleijenberg G, et al. Adolescent chronic fatigue syndrome: prevalence,  
11 incidence, and morbidity. *Pediatrics* 2011;127(5):e1169-75.
- 12 2. Crawley EM, Emond AM, Sterne JA. Unidentified Chronic Fatigue Syndrome/myalgic  
13 encephalomyelitis (CFS/ME) is a major cause of school absence: surveillance outcomes from  
14 school-based clinics. *BMJ open* 2011;1(2):e000252.
- 15 3. Fukuda K, Straus SE, Hickie I, et al. The Chronic Fatigue Syndrome: A Comprehensive  
16 Approach to Its Definition and Study. *Annals of Internal Medicine* 1994;121(12):953.
- 17 4. Knoop H, Stulemeijer M, Prins JB, et al. Is cognitive behaviour therapy for chronic fatigue  
18 syndrome also effective for pain symptoms? *Behaviour Research And Therapy*  
19 2007;45(9):2034-43.
- 20 5. Crawley E, Sterne JA. Association between school absence and physical function in paediatric  
21 chronic fatigue syndrome/myalgic encephalopathy. *Archives of Disease in Childhood*  
22 2009;94(10):752-56.
- 23 6. Nisenbaum R, Reyes M, Unger ER, et al. Factor analysis of symptoms among subjects with  
24 unexplained chronic fatigue: what can we learn about chronic fatigue syndrome? *J Psychosom*  
25 *Res* 2004;56(2):171-8.
- 26 7. Sullivan PF, Pedersen NL, Jacks A, et al. Chronic fatigue in a population sample: definitions  
27 and heterogeneity. *Psychol Med* 2005;35(9):1337-48.
- 28 8. Wyller VB, Helland IB. Relationship between autonomic cardiovascular control, case  
29 definition, clinical symptoms, and functional disability in adolescent chronic fatigue  
30 syndrome: an exploratory study. *BioPsychoSocial medicine* 2013;7(1):5.
- 31 9. Brurberg KG, Fonhus MS, Larun L, et al. Case definitions for chronic fatigue  
32 syndrome/myalgic encephalomyelitis (CFS/ME): a systematic review. *BMJ open*  
33 2014;4(2):e003973.
- 34 10. Royal College of Paediatrics and Child Health. *Evidence based guidelines for the*  
35 *management of CFS/ME (chronic fatigue syndrome/myalgic encephalopathy) in children and*  
36 *young adults*. London: Royal College of Paediatrics and Child Health 2004.
- 37 11. National Institute of Health and Care Excellence. Chronic fatigue syndrome/myalgic  
38 encephalomyelitis (or encephalopathy): Diagnosis and management of CFS/ME in adults and  
39 children, 2007.
- 40 12. Carruthers BM, van de Sande MI, De Meirleir KL, et al. Myalgic encephalomyelitis:  
41 International Consensus Criteria. *J Intern Med* 2011;270(4):327-38.
- 42 13. Nijs J, Crombez G, Meeus M, et al. Pain in patients with chronic fatigue syndrome: time for  
43 specific pain treatment? *Pain physician* 2012;15(5):E677-86.
- 44 14. Meeus M, Nijs J, Meirleir KD. Chronic musculoskeletal pain in patients with the chronic  
45 fatigue syndrome: a systematic review. *European Journal Of Pain (London, England)*  
46 2007;11(4):377-86.
- 47 15. Sulheim D, Fagermoen E, Winger A, et al. Disease Mechanisms and Clonidine Treatment in  
48 Adolescent Chronic Fatigue Syndrome: A Combined Cross-sectional and Randomized  
49 Clinical Trial. *JAMA pediatrics* 2014.
- 50 16. Meeus M, Nijs J. Central sensitization: a biopsychosocial explanation for chronic widespread  
51 pain in patients with fibromyalgia and chronic fatigue syndrome. *Clinical Rheumatology*  
52 2007;26(4):465-73.
- 53 17. Meeus M, Roussel NA, Truijzen S, et al. Reduced pressure pain thresholds in response to  
54 exercise in chronic fatigue syndrome but not in chronic low back pain: an experimental study.  
55  
56  
57  
58  
59  
60

- 1  
2  
3 *Journal of rehabilitation medicine : official journal of the UEMS European Board of Physical*  
4 *and Rehabilitation Medicine* 2010;42(9):884-90.
- 5 18. Nijs J, Meeus M, Van Oosterwijck J, et al. In the mind or in the brain? Scientific evidence for  
6 central sensitisation in chronic fatigue syndrome. *Eur J Clin Invest* 2012;42(2):203-12.
- 7 19. International Association for the Study of Pain (IASP). Classification of Chronic Pain,  
8 Descriptions of chronic Pain Syndromes and Definitions of Pain terms. *Elsevier, Amsterdam*  
9 1986.
- 10 20. Wyller VB, Eriksen HR, Malterud K. Can sustained arousal explain the Chronic Fatigue  
11 Syndrome? *Behavioral and brain functions : BBF* 2009;5:10.
- 12 21. Van De Putte EM, Uiterwaal CSPM, Bots ML, et al. Is Chronic Fatigue Syndrome a  
13 Connective Tissue Disorder? A Cross-Sectional Study in Adolescents. *Pediatrics*  
14 2005;115(4):e415-e22.
- 15 22. Patel MX, Smith DG, Chalder T, et al. Chronic fatigue syndrome in children: a cross sectional  
16 survey. *Arch Dis Child* 2003;88(10):894-8.
- 17 23. Rangel L, Garralda ME, Levin M, et al. The course of severe chronic fatigue syndrome in  
18 childhood. *J R Soc Med* 2000;93(3):129-34.
- 19 24. Merskey H, Bogduk, N. Classification of chronic pain . *IASP Task Force on Taxonomy. IASP*  
20 *Press, Seattle* 1994.
- 21 25. Daut RL, Cleeland CS, Flanery RC. Development of the Wisconsin Brief Pain Questionnaire  
22 to assess pain in cancer and other diseases. *Pain* 1983;17(2):197-210.
- 23 26. Cleeland CS, Ryan KM. Pain assessment: global use of the Brief Pain Inventory. *Ann Acad*  
24 *Med Singapore* 1994;23(2):129-38.
- 25 27. Klepstad P, Loge JH, Borchgrevink PC, et al. The Norwegian Brief Pain Inventory  
26 Questionnaire: Translation and Validation in Cancer Pain Patients. *Journal of Pain and*  
27 *Symptom Management* 2002;24(5):517-25.
- 28 28. Williams DA, Arnold LM. Measures of fibromyalgia: Fibromyalgia Impact Questionnaire  
29 (FIQ), Brief Pain Inventory (BPI), Multidimensional Fatigue Inventory (MFI-20), Medical  
30 Outcomes Study (MOS) Sleep Scale, and Multiple Ability Self-Report Questionnaire  
31 (MASQ). *Arthritis care & research* 2011;63 Suppl 11:S86-97.
- 32 29. Tan G, Jensen MP, Thornby JI, et al. Validation of the brief pain inventory for chronic  
33 nonmalignant pain. *The Journal of Pain* 2004;5(2):133-37.
- 34 30. Engel J. Pain in Youths With Neuromuscular Disease. *American Journal of Hospice &*  
35 *Palliative Medicine* 2009;26(5):405-12.
- 36 31. Gaffney A, McGrath, P. J., & Dick, B. Measuring pain in children: Developmental and  
37 instrumental issues. In: N. L. Schechter CBB, & M. Yaster (Eds.), ed. Pain in infants, children,  
38 and adolescents. Philadelphia: Lippincott Williams & Wilkins, 2003.
- 39 32. Engel JM, Jensen MP, Ciol MA, et al. The development and preliminary validation of the  
40 pediatric survey of pain attitudes. *American journal of physical medicine & rehabilitation /*  
41 *Association of Academic Physiatrists* 2012;91(2):114-21.
- 42 33. Engel JM, Petrino TJ, Dudgeon BJ, et al. Cerebral palsy and chronic pain: a descriptive study  
43 of children and adolescents. *Physical & occupational therapy in pediatrics* 2005;25(4):73-84.
- 44 34. Roth-Isigkeit A, Raspe HH, Stoven H, et al. [Pain in children and adolescents--results of an  
45 exploratory epidemiological study]. *Schmerz* 2003;17(3):171-8.
- 46 35. Nie H, Arendt-Nielsen L, Andersen H, et al. Temporal summation of pain evoked by  
47 mechanical stimulation in deep and superficial tissue. *J Pain* 2005;6(6):348-55.
- 48 36. Rombaut L, Scheper M, De Wandele I, et al. Chronic pain in patients with the hypermobility  
49 type of Ehlers-Danlos syndrome: evidence for generalized hyperalgesia. *Clin Rheumatol* 2014.
- 50 37. Ger LP, Ho ST, Sun WZ, et al. Validation of the Brief Pain Inventory in a Taiwanese  
51 population. *J Pain Symptom Manage* 1999;18(5):316-22.
- 52 38. Meeus M, Nijs J, Huybrechts S, et al. Evidence for generalized hyperalgesia in chronic fatigue  
53 syndrome: a case control study. *Clin Rheumatol* 2010;29(4):393-8.
- 54 39. Wolfe F, Smythe HA, Yunus MB, et al. The American College of Rheumatology 1990 criteria  
55 for the classification of fibromyalgia: Report of the multicenter criteria committee. *Arthritis*  
56 *and rheumatism* 1990;33:160-72.
- 57  
58  
59  
60



- 1  
2  
3 40. Yarnitsky D. Conditioned pain modulation (the diffuse noxious inhibitory control-like effect):  
4 its relevance for acute and chronic pain states. *Current opinion in anaesthesiology*  
5 2010;23(5):611-5.
- 6 41. Bell DS, Robinson M, Jordan K. Thirteen-Year Follow-Up of Children and Adolescents With  
7 Chronic Fatigue Syndrome. *Pediatrics* 2001;107(5):994.
- 8 42. Nielsen CS, Stubhaug A, Price DD, et al. Individual differences in pain sensitivity: Genetic  
9 and environmental contributions. *PAIN* 2008;136(1-2):21-29.
- 10 43. Turk DC. Cognitive-behavioral approach to the treatment of chronic pain patients. *Regional*  
11 *anesthesia and pain medicine* 2003;28(6):573-9.
- 12 44. Vlaeyen JW, Linton SJ. Fear-avoidance and its consequences in chronic musculoskeletal pain:  
13 a state of the art. *Pain* 2000;85(3):317-32.
- 14 45. Nijs J, Van de Putte K, Louckx F, et al. Exercise performance and chronic pain in chronic  
15 fatigue syndrome: the role of pain catastrophizing. *Pain Med* 2008;9(8):1164-72.
- 16 46. Hareide L, Finset A, Wyller VB. Chronic fatigue syndrome: a qualitative investigation of  
17 young patient's beliefs and coping strategies. *Disability and Rehabilitation* 2011;33(23-  
18 24):2255-63.
- 19 47. Wyller VB. The chronic fatigue syndrome – an update. *Acta Neurologica Scandinavica*  
20 2007;115:7-14.
- 21 48. Garralda EM, Chalder, T. Practitioner Review: Chronic fatigue syndrome in childhood. *J*  
22 *Child Psychol Psyc* 2005;46(11):1143-51.
- 23 49. Nijhof SL, Priesterbach LP, Bleijenberg G, et al. Functional Improvement Is Accompanied by  
24 Reduced Pain in Adolescent Chronic Fatigue Syndrome. *Pain Medicine* 2013;14(9):1435-38.
- 25 50. Haraldstad K, Sorum R, Eide H, et al. Pain in children and adolescents: prevalence, impact on  
26 daily life, and parents' perception, a school survey. *Scand J Caring Sci* 2011;25(1):27-36.
- 27 51. King S, Chambers CT, Huguet A, et al. The epidemiology of chronic pain in children and  
28 adolescents revisited: a systematic review. *Pain* 2011;152(12):2729-38.
- 29 52. Hoftun GB, Romundstad PR, Zwart J-A, et al. Chronic idiopathic pain in adolescence – high  
30 prevalence and disability: The young HUNT study 2008. *PAIN* 2011;152(10):2259-66.
- 31 53. Petersen S, Hagglof BL, Bergstrom EI. Impaired health-related quality of life in children with  
32 recurrent pain. *Pediatrics* 2009;124(4):e759-67.
- 33 54. Davies S, Crawley E. Chronic fatigue syndrome in children aged 11 years old and younger.  
34 *Archives of Disease in Childhood* 2008;93(5):419-22.
- 35 55. van de Putte EM, Engelbert RHH, Kuis W, et al. How fatigue is related to other somatic  
36 symptoms. *Archives of Disease in Childhood* 2006;91(10):824-27.
- 37 56. Whiteside A, Hansen S, Chaudhuri A. Exercise lowers pain threshold in chronic fatigue  
38 syndrome. *Pain* 2004;109(3):497-9.
- 39 57. Hunfeld JA, Perquin CW, Duivenvoorden HJ, et al. Chronic pain and its impact on quality of  
40 life in adolescents and their families. *J Pediatr Psychol* 2001;26(3):145-53.
- 41 58. Gold JI, Yetwin AK, Mahrer NE, et al. Pediatric chronic pain and health-related quality of  
42 life. *J Pediatr Nurs* 2009;24(2):141-50.
- 43 59. Winger A, Ekstedt M, Wyller VB, et al. 'Sometimes it feels as if the world goes on without  
44 me': adolescents' experiences of living with chronic fatigue syndrome. *J Clin Nurs* 2013.
- 45  
46  
47  
48  
49  
50  
51  
52  
53  
54  
55  
56  
57  
58  
59  
60
